# Supplementary material
Source: ML conference proceedings conference paper supplement (https://proceedings.neurips.cc/paper_files/paper/2018/hash/59ab3ba90ae4b4ab84fe69de7b8e3f5f-Abstract.html)
Supplement: Supplementary file [file 59ab3ba90ae4b4ab84fe69de7b8e3f5f-Supplemental.zip]

## A Preliminaries

### A.1 Contraction Lemmas

**Lemma 1** (e.g. [25]). Let  $\mathcal{F}$  be any scalar-valued function class and  $\phi_1, \dots, \phi_n$  be any sequence of functions where  $\phi_t : \mathbb{R} \rightarrow \mathbb{R}$  is  $L$ -Lipschitz. Then

$$\mathbb{E}_\epsilon \sup_{f \in \mathcal{F}} \sum_{t=1}^n \epsilon_t \phi_t(f(x_t)) \leq L \cdot \mathbb{E}_\epsilon \sup_{f \in \mathcal{F}} \sum_{t=1}^n \epsilon_t f(x_t). \quad (9)$$

The following is a weighted generalization of the vector-valued Lipschitz contraction inequality.

**Lemma 2.** Let  $\mathcal{F} \subseteq (\mathcal{X} \rightarrow \mathbb{R}^K)$ , and let  $h_t : \mathbb{R}^K \rightarrow \mathbb{R}$  be a sequence of functions for  $t \in [n]$ . Suppose each  $h_t$  is 1-Lipschitz with respect to  $\|z\|_{A_t} := \sqrt{\langle z, A_t z \rangle}$ , where  $A_t \in \mathbb{R}^{K \times K}$  is positive semidefinite. Then

$$\mathbb{E}_\epsilon \sup_{f \in \mathcal{F}} \sum_{t=1}^n \epsilon_t h_t(f(x_t)) \leq \sqrt{2} \mathbb{E}_\epsilon \sup_{f \in \mathcal{F}} \sum_{t=1}^n \langle \epsilon_t, A_t^{1/2} f(x_t) \rangle. \quad (10)$$

**Proof sketch for Lemma 2.** Same proof as Theorem 3 in [30], with the additional observation that  $\|z\|_{A_t} = \|A_t^{1/2} z\|_2$ .  $\square$

**Lemma 3.** Let  $\mathcal{G}$  be a class of vector-valued functions whose output space forms  $M$  blocks of vectors, i.e. each  $g \in \mathcal{G}$  has the form  $g : \mathcal{Z} \rightarrow \mathbb{R}^{d_1+d_2+\dots+d_M}$ , where  $g(z)_i \in \mathbb{R}^{d_i}$  denotes the  $i$ th block. Let  $h_t : \mathbb{R}^{d_1+d_2+\dots+d_M} \rightarrow \mathbb{R}$ , be a sequence of functions for  $t \in [n]$  that satisfy the following block-wise Lipschitz property: For any assignment  $a_1, \dots, a_M$  with each  $a_i \in \mathbb{R}^{d_i}$ ,  $h_t(a_1, \dots, a_M)$  is  $L_i$ -Lipschitz with respect to  $a_i$  in the  $\ell_2$  norm. Then

$$\mathbb{E}_\epsilon \sup_{g \in \mathcal{G}} \sum_{t=1}^n h_t(g_1(z_t), \dots, g_M(z_t)) \leq \sqrt{2M} \sum_{i=1}^M L_i \mathbb{E}_\epsilon \sup_{f \in \mathcal{F}} \sum_{t=1}^n \langle \epsilon_t, g_i(z_t) \rangle.$$

**Proof.** Immediate consequence of Lemma 2, along with sub-additivity of the supremum.  $\square$

### A.2 Bound for Vector-Valued Random Variables

**Definition 5.** For any vector space  $\mathcal{V}$ , a convex function  $\Psi : \mathcal{V} \rightarrow \mathbb{R}$  is  $\beta$ -smooth with respect to a norm  $\|\cdot\|$  if

$$\Psi(x) \leq \Psi(y) + \langle \nabla \Psi(y), x - y \rangle + \frac{\beta}{2} \|x - y\|^2 \quad \forall x, y \in \mathcal{V}.$$

A norm  $\|\cdot\|$  is said to be  $\beta$ -smooth if the function  $\Psi(x) = \frac{1}{2} \|x\|^2$  is  $\beta$ -smooth with respect to  $\|\cdot\|$ .

**Theorem 7.** Let  $\|\cdot\|$  be any norm for which there exists  $\Psi$  such that  $\Psi(x) \geq \frac{1}{2} \|x\|^2$ ,  $\Psi(0) = 0$ , and  $\Psi$  is  $\beta$ -smooth with respect to  $\|\cdot\|$ . Then

$$\mathbb{E}_\epsilon \left\| \sum_{t=1}^n \epsilon_t x_t \right\| \leq \sqrt{\beta \sum_{t=1}^n \|x_t\|^2}.$$

The reader may consult [34] for a high-probability version of this theorem.

**Fact 1.** The following spaces and norms satisfy the preconditions of Theorem 7:

- $(\mathbb{R}^d, \ell_p)$  for  $p \geq 2$ , with  $\beta = p - 1$  [19].
- $(\mathbb{R}^d, \ell_\infty)$ , with  $\beta = O(\log d)$  [19].
- $(\mathbb{R}^{d_1 \times d_2}, \|\cdot\|_\sigma)$ , with  $\beta = O(\log(d_1 + d_2))$  [22].

**Proof of Theorem 7.** Using Jensen's inequality and the upper bound property of  $\Psi$  we have

$$\mathbb{E}_\epsilon \left\| \sum_{t=1}^n \epsilon_t x_t \right\| \leq \sqrt{\mathbb{E}_\epsilon \left\| \sum_{t=1}^n \epsilon_t x_t \right\|^2} \leq \sqrt{2} \cdot \sqrt{\mathbb{E}_\epsilon \Psi \left( \sum_{t=1}^n \epsilon_t x_t \right)}.$$

Applying the smoothness property at time  $n$ , and using that  $\epsilon_n$  is independent of  $\epsilon_1, \dots, \epsilon_{n-1}$ :

$$\sqrt{\mathbb{E}_\epsilon \Psi \left( \sum_{t=1}^n \epsilon_t x_t \right)} \leq \sqrt{\mathbb{E}_\epsilon \left[ \Psi \left( \sum_{t=1}^{n-1} \epsilon_t x_t \right) + \left\langle \Psi \left( \sum_{t=1}^{n-1} \epsilon_t x_t \right), \epsilon_n x_n \right\rangle + \frac{\beta}{2} \|x_n\|^2 \right]} = \sqrt{\mathbb{E}_\epsilon \Psi \left( \sum_{t=1}^{n-1} \epsilon_t x_t \right) + \frac{\beta}{2} \|x_n\|^2}.$$

The result follows by repeating this argument from time  $t = n - 1$  to  $t = 1$ .  $\square$

## B Proofs from Section 2

**Theorem 8** ([5], Theorem A.2/Lemma A.5). *Let  $\mathcal{F} \subseteq (Z \rightarrow \mathbb{R})$  be a class of functions. Let  $Z_1, \dots, Z_n \sim \mathcal{D}$  i.i.d. for some distribution  $\mathcal{D}$ . Then with probability at least  $1 - \delta$  over the draw of  $Z_{1:n}$ ,*

$$\mathbb{E} \sup_{f \in \mathcal{F}} \left| \mathbb{E}_Z f(Z) - \frac{1}{n} \sum_{t=1}^n f(Z_t) \right| \leq 4 \mathbb{E}_\epsilon \sup_{f \in \mathcal{F}} \frac{1}{n} \sum_{t=1}^n \epsilon_t f(Z_t) + 4 \sup_{f \in \mathcal{F}} \sup_{z \in Z} |f(z)| \cdot \frac{\log\left(\frac{2}{\delta}\right)}{n}. \quad (11)$$

**Lemma 4** (Uniform convergence for vector-valued functions). *Let  $\mathcal{G} \subseteq \{g : Z \rightarrow \mathfrak{B}\}$  for arbitrary set  $Z$  and vector space  $\mathfrak{B}$ . Let  $Z_1, \dots, Z_n \sim \mathcal{D}$  i.i.d. for some distribution  $\mathcal{D}$ . Let a norm  $\|\cdot\|$  over  $\mathfrak{B}$  be fixed. Then with probability at least  $1 - \delta$  over the draw of  $Z_{1:n}$ ,*

$$\mathbb{E} \sup_{g \in \mathcal{G}} \left\| \mathbb{E}_Z g(Z) - \frac{1}{n} \sum_{t=1}^n g(Z_t) \right\| \leq 4 \mathbb{E}_\epsilon \sup_{g \in \mathcal{G}} \left\| \frac{1}{n} \sum_{t=1}^n \epsilon_t g(Z_t) \right\| + 4 \sup_{g \in \mathcal{G}} \sup_{Z \in Z} \|g(Z)\| \cdot \frac{\log\left(\frac{2}{\delta}\right)}{n} \quad (12)$$

for some absolute constant  $c > 0$ .

**Proof of Lemma 4.** This follows immediately by applying [Theorem 8](#) to the expanded function class  $\mathcal{F} := \{Z \mapsto \langle g(Z), v \rangle \mid g \in \mathcal{G}, \|v\|_* \leq 1\}$ .  $\square$

**Proof of Proposition 1.** This is a direct consequence of McDiarmid's inequality. Consider any vector-valued function class of functions  $\mathcal{G}$ . Let  $Z_1, \dots, Z_n \sim \mathcal{D}$  i.i.d. for some distribution  $\mathcal{D}$ . Then McDiarmid's inequality implies that with probability at least  $1 - \delta$  over the draw of  $Z_{1:n}$ ,

$$\sup_{g \in \mathcal{G}} \left\| \mathbb{E}_Z g(Z) - \frac{1}{n} \sum_{t=1}^n g(Z_t) \right\| \leq \mathbb{E} \sup_{g \in \mathcal{G}} \left\| \mathbb{E}_Z g(Z) - \frac{1}{n} \sum_{t=1}^n g(Z_t) \right\| + c \cdot \sup_{g \in \mathcal{G}} \sup_{Z \in Z} \|g(Z)\| \cdot \sqrt{\frac{\log\left(\frac{2}{\delta}\right)}{n}}. \quad (13)$$

**Proof of Proposition 2.** This follows by applying the uniform convergence lemma, [Lemma 4](#), to the class  $\mathcal{G} = \{(x, y) \mapsto \nabla \ell(w; x, y) \mid w \in \mathcal{W}\}$ .  $\square$

**Proof of Theorem 1.** We write

$$\mathbb{E}_\epsilon \sup_{w \in \mathcal{W}} \left\| \sum_{t=1}^n \epsilon_t \nabla (G_t(F_t(w))) \right\| = \mathbb{E}_\epsilon \sup_{w \in \mathcal{W}} \sup_{v \in \mathfrak{B}^*: \|v\|_* \leq 1} \sum_{t=1}^n \epsilon_t \langle \nabla (G_t(F_t(w))), v \rangle,$$

Using the chain rule for differentiation we have

$$\langle \nabla (G_t(F_t(w))), v \rangle = \langle (\nabla G_t)(F_t(w)), (\langle \nabla F_{t,k}(w), v \rangle)_{k \in [K]} \rangle.$$

We now introduce new functions that relabel the quantities in this expression. Let  $h : \mathbb{R}^{2K} \rightarrow \mathbb{R}$  be given by  $h(a, b) = \langle a, b \rangle$ , let  $f_1 : \mathcal{W} \rightarrow \mathbb{R}^K$  be given by  $f_1(w) = (\nabla G_t)(F_t(w))$  and  $f_2$  be given by  $f_2(w, v) = (\langle \nabla F_{t,k}(w), v \rangle)_{k \in [K]}$ . We apply the block-wise contraction lemma [Lemma 3](#) with one block for  $f_1$  and one block for  $f_2$  to conclude

$$\begin{aligned} & \mathbb{E}_\epsilon \sup_{w \in \mathcal{W}} \sup_{v \in \mathfrak{B}^*: \|v\|_* \leq 1} \sum_{t=1}^n \epsilon_t h(f_1(w), f_2(w, v)) \\ & \leq 2L_F \mathbb{E}_\epsilon \sup_{w \in \mathcal{W}} \sup_{v \in \mathfrak{B}^*: \|v\|_* \leq 1} \sum_{t=1}^n \langle \epsilon_t, f_1(w) \rangle + 2L_G \mathbb{E}_\epsilon \sup_{w \in \mathcal{W}} \sup_{v \in \mathfrak{B}^*: \|v\|_* \leq 1} \sum_{t=1}^n \langle \epsilon_t, f_2(w, v) \rangle, \end{aligned}$$

which establishes the result after expanding terms. All that must be verified is that the assumptions on the norm bounds for  $\nabla G_t$  and  $\nabla F_t$  in the theorem statement ensure the Lipschitz requirement in the statement of [Lemma 3](#) is met.  $\square$

## C Proofs from Section 3

For all proofs in this section we adopt the notation  $s := \|w^*\|_0$ , and use  $c > 0$  to denote an absolute constant whose precise value depends on context.

### C.1 Generalized Linear Models

**Proof of Theorem 3.** To begin, we apply Proposition 1 and Proposition 2 to conclude that whenever  $(\alpha, \mu)$ -PL holds, with probability at least  $1 - \delta$  over the examples  $\{(x_t, y_t)\}_{t=1}^n$ , any learning algorithm  $\widehat{w}^{\text{alg}} \in \mathcal{W}$  satisfies

$$L_{\mathcal{D}}(\widehat{w}^{\text{alg}}) - L^* \leq c \cdot \mu \left( \|\nabla \widehat{L}_n(\widehat{w}^{\text{alg}})\|^\alpha + \left( \frac{\Re_{\|\cdot\|}(\nabla \ell \circ \mathcal{W}; x_{1:n}, y_{1:n})}{n} + 2C_\sigma R \sqrt{\frac{\log(1/\delta)}{n}} \right)^\alpha \right). \quad (14)$$

Here  $c > 0$  is an absolute constant and we have used that  $\|\nabla \ell(w; x_t, y_t)\| \leq 2C_\sigma R$ .

**Smooth high-dimensional setup** For the general smooth norm pair setup in (14), Lemma 5 and Lemma 7 imply

$$\begin{aligned} L_{\mathcal{D}}(\widehat{w}^{\text{alg}}) - L^* &\leq c \cdot \frac{BC_\sigma}{c_\sigma} \left( \|\nabla \widehat{L}_n(\widehat{w}^{\text{alg}})\| + \left( BR^2 C_\sigma^2 \sqrt{\frac{\beta}{n}} + 2C_\sigma R \sqrt{\frac{\log(1/\delta)}{n}} \right) \right) \\ &= \mu_h \cdot \|\nabla \widehat{L}_n(\widehat{w}^{\text{alg}})\| + \frac{C_h}{\sqrt{n}}, \end{aligned}$$

where we recall  $C_h = c \cdot \frac{B^2 R^2 C_\sigma^3 \sqrt{\beta} + 2C_\sigma^2 BR \sqrt{\log(1/\delta)}}{c_\sigma}$  and  $\mu_h = c \cdot \frac{BC_\sigma}{c_\sigma}$ .

**Low-dimensional  $\ell_2/\ell_2$  setup** For the low-dimension  $\ell_2/\ell_2$  pair setup in (14), Lemma 5 and Lemma 7 imply

$$\begin{aligned} L_{\mathcal{D}}(\widehat{w}^{\text{alg}}) - L^* &\leq c \cdot \frac{C_\sigma}{4c_\sigma^3 \lambda_{\min}(\Sigma)} \left( \|\nabla \widehat{L}_n(\widehat{w}^{\text{alg}})\|^2 + \left( BR^2 C_\sigma^2 \sqrt{\frac{1}{n}} + 2C_\sigma R \sqrt{\frac{\log(1/\delta)}{n}} \right)^2 \right) \\ &= \frac{\mu_1}{\lambda_{\min}(\Sigma)} \cdot \|\nabla \widehat{L}_n(\widehat{w}^{\text{alg}})\|^2 + \frac{C_1}{n \cdot \lambda_{\min}(\Sigma)}, \end{aligned}$$

where we have used that the  $\ell_2$  norm is 1-smooth in Lemma 7. Recall that  $C_1 = c \cdot \frac{2C_\sigma^5 R^4 B^2 + 8C_\sigma^3 R^2 \log(1/\delta)}{4c_\sigma^3}$  and  $\mu_1 = c \cdot \frac{C_\sigma}{4c_\sigma^3}$ .

**Sparse  $\ell_\infty/\ell_1$  setup** For the sparse  $\ell_\infty/\ell_1$  pair setup in (14), Lemma 5 and Lemma 7 imply

$$\begin{aligned} L_{\mathcal{D}}(\widehat{w}^{\text{alg}}) - L^* &\leq c \cdot \frac{C_\sigma s}{c_\sigma^3 \psi_{\min}(\Sigma)} \left( \|\nabla \widehat{L}_n(\widehat{w}^{\text{alg}})\|^2 + \left( BR^2 C_\sigma^2 \sqrt{\frac{\log d}{n}} + 2C_\sigma R \sqrt{\frac{\log(1/\delta)}{n}} \right)^2 \right) \\ &= \frac{\mu_s \cdot s}{\psi_{\min}(\Sigma)} \cdot \|\nabla \widehat{L}_n(\widehat{w}^{\text{alg}})\|^2 + \frac{s}{n} \cdot \frac{C_s}{\psi_{\min}(\Sigma)}, \end{aligned}$$

where we have used that the  $\ell_\infty$  norm has the smoothness property with  $\beta = O(\log(d))$  in Lemma 7. Recall that  $C_s = c \cdot \frac{2C_\sigma^5 R^4 B^2 \log(d) + 8C_\sigma^3 R^2 \log(1/\delta)}{c_\sigma^3}$  and  $\mu_s = c \cdot \frac{C_\sigma}{c_\sigma^3}$ .

□

**Lemma 5** (GD condition for the GLM). Consider the generalized linear model setup of Section 3.

- When  $\|\cdot\|/\|\cdot\|_*$  are any dual norm pair, we have  $(1, \frac{BC_\sigma}{c_\sigma})$ -GD:

$$L_{\mathcal{D}}(w) - L_{\mathcal{D}}(w^*) \leq \frac{BC_\sigma}{c_\sigma} \|\nabla L_{\mathcal{D}}(w)\| \quad \forall w \in \mathcal{W}. \quad (15)$$

- In the  $\ell_2/\ell_2$  setup, we have  $\left(2, \frac{C_\sigma}{4c_\sigma^3 \lambda_{\min}(\Sigma)}\right)$ -GD:

$$L_{\mathcal{D}}(w) - L_{\mathcal{D}}(w^*) \leq \frac{C_\sigma}{4c_\sigma^3 \lambda_{\min}(\Sigma)} \|\nabla L_{\mathcal{D}}(w)\|_2^2 \quad \forall w \in \mathcal{W}. \quad (16)$$

- In the sparse  $\ell_\infty/\ell_1$  setup, where  $\|w^*\|_0 \leq s$ , we have  $\left(2, \frac{C_\sigma s}{c_\sigma^3 \psi_{\min}(\Sigma)}\right)$ -GD:

$$L_{\mathcal{D}}(w) - L_{\mathcal{D}}(w^*) \leq \frac{C_\sigma s}{c_\sigma^3 \psi_{\min}(\Sigma)} \|\nabla L_{\mathcal{D}}(w)\|_\infty^2 \quad \forall w \in \mathcal{W}. \quad (17)$$

**Proof of Lemma 5.**

**Upper bound for excess risk.** We first prove the following intermediate upper bound:

$$L_{\mathcal{D}}(w) - L_{\mathcal{D}}(w^*) \leq \frac{C_\sigma}{2c_\sigma} \langle \nabla L_{\mathcal{D}}(w), w - w^* \rangle. \quad (18)$$

Letting  $w \in \mathcal{W}$  be fixed, we have

$$\langle \nabla L_{\mathcal{D}}(w), w - w^* \rangle = 2 \mathbb{E}_{(x,y)} [(\sigma(\langle w, x \rangle) - y) \sigma'(\langle w, x \rangle) \langle w - w^*, x \rangle].$$

Using the well-specified assumption:

$$= 2 \mathbb{E}_x [(\sigma(\langle w, x \rangle) - \sigma(\langle w^*, x \rangle)) \sigma'(\langle w, x \rangle) \langle w - w^*, x \rangle].$$

We now consider the term inside the expectation. Since  $\sigma$  is increasing we have

$$\sigma(\langle w, x \rangle) - \sigma(\langle w^*, x \rangle) \sigma'(\langle w, x \rangle) \langle w - w^*, x \rangle = |\sigma(\langle w, x \rangle) - \sigma(\langle w^*, x \rangle)| \cdot |\langle w - w^*, x \rangle| \cdot \sigma'(\langle w, x \rangle)$$

point-wise. We apply two lower bounds. First,  $\sigma'(\langle w, x \rangle) > c_\sigma$  by assumption. Second, Lipschitzness of  $\sigma$  implies

$$|\sigma(\langle w, x \rangle) - \sigma(\langle w^*, x \rangle)| \leq C_\sigma |\langle w - w^*, x \rangle|.$$

Combining these inequalities, we also obtain the following inequality in expectation over  $x$ :

$$\mathbb{E}_x (\sigma(\langle w, x \rangle) - \sigma(\langle w^*, x \rangle))^2 \leq \frac{C_\sigma}{2c_\sigma} \langle \nabla L_{\mathcal{D}}(w), w - w^* \rangle.$$

Lastly, since the model is well-specified we have

$$L_{\mathcal{D}}(w) - L_{\mathcal{D}}(w^*) = \mathbb{E}_x (\sigma(\langle w, x \rangle) - \sigma(\langle w^*, x \rangle))^2,$$

by a standard argument:

$$\begin{aligned} L_{\mathcal{D}}(w) - L_{\mathcal{D}}(w^*) &= \mathbb{E}_{x,y} [\sigma^2(\langle w, x \rangle) + y^2 - 2\sigma(\langle w, x \rangle)y - \sigma^2(\langle w^*, x \rangle) - y^2 + 2\sigma(\langle w^*, x \rangle)y] \\ &= \mathbb{E}_x [\sigma^2(\langle w, x \rangle) - 2\sigma(\langle w, x \rangle)\sigma(\langle w^*, x \rangle) + \sigma^2(\langle w^*, x \rangle)] \\ &= \mathbb{E}_x (\sigma(\langle w, x \rangle) - \sigma(\langle w^*, x \rangle))^2. \end{aligned}$$

**Proving the GD conditions.** With the inequality (18) established the various GD inequalities follow in quick succession.

- $\left(1, \frac{BC_\sigma}{c_\sigma}\right)$ -GD:

To prove this inequality, simply use Hölder's inequality to obtain the upper bound,

$$\langle \nabla L_{\mathcal{D}}(w), w - w^* \rangle \leq 2B \|\nabla L_{\mathcal{D}}(w)\|.$$

- $\left(2, \frac{C_\sigma}{4c_\sigma^3 \lambda_{\min}(\mathbb{E}[xx^\top])}\right)$ -GD:

Resuming from (18) we have

$$L_{\mathcal{D}}(w) - L_{\mathcal{D}}(w^*) \leq \frac{C_\sigma}{2c_\sigma} \langle \nabla L_{\mathcal{D}}(w), w - w^* \rangle.$$

Let  $P_{\mathcal{X}}$  denote the orthogonal projection onto  $\text{span}(\mathbb{E}[xx^\top])$ . Note that  $\nabla \ell(w; x, y)$  is parallel to  $x$ , we can thus introduce the projection matrix  $P_{\mathcal{X}}$  while preserving the inner product

$$= \frac{C_\sigma}{2c_\sigma} \langle P_{\mathcal{X}} \nabla L_{\mathcal{D}}(w), P_{\mathcal{X}}(w - w^*) \rangle$$

Applying Cauchy-Schwarz:

$$\leq \frac{C_\sigma}{2c_\sigma} \|\nabla L_{\mathcal{D}}(w)\|_2 \cdot \|P_{\mathcal{X}}(w - w^*)\|_2. \quad (19)$$

What remains is to relate the gradient norm to the term  $\|P_{\mathcal{X}}(w - w^*)\|_2$ . We proceed with another lower bound argument similar to the one used to establish (18),

$$\langle \nabla L_{\mathcal{D}}(w), w - w^* \rangle = 2 \mathbb{E}_{(x,y)} [(\sigma(\langle w, x \rangle) - y) \sigma'(\langle w, x \rangle) \langle w - w^*, x \rangle].$$

Using the well-specified assumption once more:

$$= 2 \mathbb{E}_x [(\sigma(\langle w, x \rangle) - \sigma(\langle w^*, x \rangle)) \sigma'(\langle w, x \rangle) \langle w - w^*, x \rangle].$$

Monotonicity of  $\sigma$ , implies the argument to the expectation is non-negative pointwise, so we have the lower bound,

$$\geq 2c_\sigma \mathbb{E}_x [(\sigma(\langle w, x \rangle) - \sigma(\langle w^*, x \rangle)) \langle w - w^*, x \rangle].$$

Consider a particular draw of  $x$  and assume  $\langle w, x \rangle \geq \langle w^*, x \rangle$  without loss of generality. Using the mean value theorem, there is some  $s \in [\langle w^*, x \rangle, \langle w, x \rangle]$  such that

$$(\sigma(\langle w, x \rangle) - \sigma(\langle w^*, x \rangle)) \langle w - w^*, x \rangle = \langle w - w^*, x \rangle^2 \sigma'(s) \geq \langle w - w^*, x \rangle^2 c_\sigma.$$

Grouping terms, we have shown

$$\begin{aligned} \langle P_{\mathcal{X}} \nabla L_{\mathcal{D}}(w), P_{\mathcal{X}}(w - w^*) \rangle &= \langle \nabla L_{\mathcal{D}}(w), w - w^* \rangle \geq 2c_\sigma^2 \mathbb{E} \langle w - w^*, x \rangle^2 \\ &= 2c_\sigma^2 \langle w - w^*, \mathbb{E}[xx^\top](w - w^*) \rangle \quad (20) \\ &\geq 2c_\sigma^2 \lambda_{\min}(\mathbb{E}[xx^\top]) \|P_{\mathcal{X}}(w - w^*)\|_2^2. \end{aligned}$$

In other words, by rearranging and applying Cauchy-Schwarz we have

$$\|P_{\mathcal{X}}(w - w^*)\|_2 \leq \frac{1}{2c_\sigma^2 \lambda_{\min}(\mathbb{E}[xx^\top])} \cdot \|\nabla L_{\mathcal{D}}(w)\|_2.$$

Combining this inequality with (19), we have

$$L_{\mathcal{D}}(w) - L_{\mathcal{D}}(w^*) \leq \frac{C_\sigma}{4c_\sigma^3 \lambda_{\min}(\mathbb{E}[xx^\top])} \cdot \|\nabla L_{\mathcal{D}}(w)\|_2^2.$$

•  $\left(2, \frac{C_\sigma s}{c_\sigma^3 \psi_{\min}(\mathbb{E}[xx^\top])}\right)$ -GD:

Using the inequality (20) from the preceeding GD proof, we have

$$\langle \nabla L_{\mathcal{D}}(w), w - w^* \rangle \geq 2c_\sigma^2 \langle w - w^*, \mathbb{E}[xx^\top](w - w^*) \rangle.$$

By the assumption that  $\|w\|_1 \leq \|w^*\|_1$ , we apply Lemma 6 to conclude that 1)  $w - w^* \in \mathcal{C}(S(w^*), 1)$  and 2)  $\|w - w^*\|_1 \leq 2\sqrt{s}\|w - w^*\|_2$ . The first fact implies that

$$\langle w - w^*, \mathbb{E}[xx^\top](w - w^*) \rangle \geq \psi_{\min}(\mathbb{E}[xx^\top]) \|w - w^*\|_2^2.$$

Rearranging, we have

$$\begin{aligned} \|w - w^*\|_2 &\leq \frac{1}{2c_\sigma^2 \psi_{\min}(\mathbb{E}[xx^\top])} \frac{\langle \nabla L_{\mathcal{D}}(w), w - w^* \rangle}{\|w - w^*\|_2} \\ &\leq \frac{1}{2c_\sigma^2 \psi_{\min}(\mathbb{E}[xx^\top])} \frac{\|\nabla L_{\mathcal{D}}(w)\|_\infty \|w - w^*\|_1}{\|w - w^*\|_2} \\ &\leq \frac{\sqrt{s}}{c_\sigma^2 \psi_{\min}(\mathbb{E}[xx^\top])} \|\nabla L_{\mathcal{D}}(w)\|_\infty. \end{aligned}$$

On the other hand, from (18) we have

$$\begin{aligned}
L_{\mathcal{D}}(w) - L_{\mathcal{D}}(w^*) &\leq \frac{C_{\sigma}}{2c_{\sigma}} \langle \nabla L_{\mathcal{D}}(w), w - w^* \rangle \\
&\leq \frac{C_{\sigma}}{2c_{\sigma}} \|\nabla L_{\mathcal{D}}(w)\|_{\infty} \|w - w^*\|_1 \\
&\leq \frac{C_{\sigma}\sqrt{s}}{c_{\sigma}} \|\nabla L_{\mathcal{D}}(w)\|_{\infty} \|w - w^*\|_2.
\end{aligned}$$

Combining this with the preceding inequality yields the result.  $\square$

The following utility lemma is a standard result in high-dimensional statistics (e.g. [41]).

**Lemma 6.** Let  $w, w^* \in \mathbb{R}^d$ . If  $\|w\|_1 \leq \|w^*\|_1$  then  $w - w^* =: \nu \in \mathcal{C}(S(w^*), 1)$ . Furthermore,  $\|\nu\|_1 \leq 2\sqrt{|S(w^*)|} \|\nu\|_2$ .

**Proof of Lemma 6.** Let  $S := S(w^*)$ . Then the constraint that  $\|w\|_1 \leq \|w^*\|_1$  implies

$$\|w^*\|_1 \geq \|w\|_1 = \|w^* + \nu\|_1 = \|w^*\|_1 + \|\nu_S\|_1 + \|\nu_{S^c}\|_1 \geq \|w^*\|_1 - \|\nu_S\|_1 + \|\nu_{S^c}\|_1.$$

Rearranging, this implies  $\|\nu_{S^c}\|_1 \leq \|\nu_S\|_1$ , so the first result is established.

For the second result,  $\nu \in \mathcal{C}(S, 1)$  implies  $\|\nu\|_1 = \|\nu_S\|_1 + \|\nu_{S^c}\|_1 \leq 2\|\nu_S\|_1 \leq 2\sqrt{|S|} \|\nu_S\|_2 \leq 2\sqrt{|S|} \|\nu\|_2$ .  $\square$

**Lemma 7.** Let the norm  $\|\cdot\|$  satisfy the smoothness property of Theorem 7 with constant  $\beta$ . Then the empirical loss gradient for the generalized linear model setting enjoys the normed Rademacher complexity bound,

$$\mathbb{E}_{\epsilon} \sup_{w \in \mathcal{W}} \left\| \sum_{t=1}^n \epsilon_t \nabla \ell(w; x_t, y_t) \right\| \leq O\left(BR^2 C_{\sigma}^2 \sqrt{\beta n}\right). \quad (21)$$

**Proof of Lemma 7.** Let  $G_t(s) = (\sigma(s) - y_t)^2$  and  $F_t(w) = \langle w, x_t \rangle$ , so that  $\ell(w; x_t, y_t) = G_t(F_t(w))$ .

Observe that  $G'_t(s) = 2(\sigma(s) - y_t)\sigma'(s)$  and  $\nabla F_t(w) = x_t$ , so our assumptions imply that  $|G'_t(s)| \leq 2C_{\sigma}$  and  $\|\nabla F_t(w)\| \leq R$ . We can thus apply Theorem 1 to conclude

$$\mathbb{E}_{\epsilon} \sup_{w \in \mathcal{W}} \left\| \sum_{t=1}^n \epsilon_t \nabla \ell(w; x_t, y_t) \right\| \leq 2R \mathbb{E}_{\epsilon} \sup_{w \in \mathcal{W}} \sum_{t=1}^n \epsilon_t G'_t(\langle w, x_t \rangle) + 4C_{\sigma} \mathbb{E}_{\epsilon} \left\| \sum_{t=1}^n \epsilon_t x_t \right\|.$$

For the first term on the left-hand side, observe that for any  $s$ ,  $|G''_t(s)| \leq 2|\sigma''(s)| + 2|\sigma'(s)|^2 \leq 4C_{\sigma}^2$ , so  $G'_t$  is  $4C_{\sigma}^2$ -Lipschitz. The classical scalar Lipschitz contraction inequality for Rademacher complexity (Lemma 1) therefore implies

$$\mathbb{E}_{\epsilon} \sup_{w \in \mathcal{W}} \sum_{t=1}^n \epsilon_t G'_t(\langle w, x_t \rangle) \leq 4C_{\sigma}^2 \mathbb{E}_{\epsilon} \sup_{w \in \mathcal{W}} \sum_{t=1}^n \epsilon_t \langle w, x_t \rangle = 4C_{\sigma}^2 B \mathbb{E}_{\epsilon} \left\| \sum_{t=1}^n \epsilon_t x_t \right\|.$$

Finally, by our smoothness assumption on the norm, Theorem 7 implies

$$\mathbb{E}_{\epsilon} \left\| \sum_{t=1}^n \epsilon_t x_t \right\| \leq \sqrt{2\beta R^2 n}.$$

$\square$

## C.2 Robust Regression

**Proof of Theorem 4.** This proof follows the same template as Theorem 3. We use Proposition 1 and Proposition 2 to conclude that whenever  $(\alpha, \mu)$ -PL holds, with probability at least  $1 - \delta$  over the examples  $\{(x_t, y_t)\}_{t=1}^n$ , any learning algorithm  $\widehat{w}^{\text{alg}}$  satisfies

$$L_{\mathcal{D}}(\widehat{w}^{\text{alg}}) - L^* \leq c \cdot \mu \left( \left\| \nabla \widehat{L}_n(\widehat{w}^{\text{alg}}) \right\|^\alpha + \left( \frac{\mathfrak{R}_{\|\cdot\|}(\nabla \ell \circ \mathcal{W}; x_{1:n}, y_{1:n})}{n} + C_\rho R \sqrt{\frac{\log(1/\delta)}{n}} \right)^\alpha \right), \quad (22)$$

where  $c > 0$  is an absolute constant and we have used that  $\|\nabla \ell(w; x_t, y_t)\| \leq C_\rho R$  with probability 1.

**Smooth high-dimensional setup** For the general smooth norm pair setup in (22), Lemma 8 and Lemma 9 imply

$$\begin{aligned} L_{\mathcal{D}}(\widehat{w}^{\text{alg}}) - L^* &\leq c \cdot \frac{BC_\rho}{c_\rho} \left( \left\| \nabla \widehat{L}_n(\widehat{w}^{\text{alg}}) \right\| + \left( BR^2 C_\rho \sqrt{\frac{\beta}{n}} + C_\rho R \sqrt{\frac{\log(1/\delta)}{n}} \right) \right) \\ &= \mu_h \cdot \left\| \nabla \widehat{L}_n(\widehat{w}^{\text{alg}}) \right\| + \frac{C_h}{\sqrt{n}}. \end{aligned}$$

Where we recall  $C_h = c \cdot \frac{B^2 R^2 C_\rho^2 \sqrt{\beta} + C_\rho^2 BR \sqrt{\log(1/\delta)}}{c_\rho}$  and  $\mu_h = c \cdot \frac{BC_\rho}{c_\rho}$ .

**Low-dimensional  $\ell_2/\ell_2$  setup** For the low-dimension  $\ell_2/\ell_2$  pair setup in (22), Lemma 8 and Lemma 9 imply

$$\begin{aligned} L_{\mathcal{D}}(\widehat{w}^{\text{alg}}) - L^* &\leq c \cdot \frac{C_\rho}{2c_\rho^2 \lambda_{\min}(\Sigma)} \left( \left\| \nabla \widehat{L}_n(\widehat{w}^{\text{alg}}) \right\|^2 + \left( BR^2 C_\rho \sqrt{\frac{1}{n}} + C_\rho R \sqrt{\frac{\log(1/\delta)}{n}} \right)^2 \right) \\ &= \frac{\mu_1}{\lambda_{\min}(\Sigma)} \cdot \left\| \nabla \widehat{L}_n(\widehat{w}^{\text{alg}}) \right\|^2 + \frac{C_1}{n \cdot \lambda_{\min}(\Sigma)}, \end{aligned}$$

where we have used that the  $\ell_2$  norm is 1-smooth in Lemma 7. Recall that  $C_1 = c \cdot \frac{C_\rho^3 R^4 B^2 + C_\rho^3 R^2 \log(1/\delta)}{c_\rho^2}$  and  $\mu_1 = c \cdot \frac{C_\rho}{2c_\rho^2}$ .

**Sparse  $\ell_\infty/\ell_1$  setup** For the sparse  $\ell_\infty/\ell_1$  pair setup in (22), Lemma 8 and Lemma 9 imply

$$\begin{aligned} L_{\mathcal{D}}(\widehat{w}^{\text{alg}}) - L^* &\leq c \cdot \frac{2C_\rho s}{c_\rho^2 \psi_{\min}(\Sigma)} \left( \left\| \nabla \widehat{L}_n(\widehat{w}^{\text{alg}}) \right\|^2 + \left( BR^2 C_\rho \sqrt{\frac{\log d}{n}} + C_\rho R \sqrt{\frac{\log(1/\delta)}{n}} \right)^2 \right) \\ &= \frac{\mu_s \cdot s}{\psi_{\min}(\Sigma)} \cdot \left\| \nabla \widehat{L}_n(\widehat{w}^{\text{alg}}) \right\|^2 + \frac{s}{n} \cdot \frac{C_s}{\psi_{\min}(\Sigma)}, \end{aligned}$$

where we have used that the  $\ell_\infty$  norm has the smoothness property with  $\beta = O(\log(d))$  in Lemma 7. Recall that  $C_s = c \cdot \frac{4C_\rho^3 R^4 B^2 \log(d) + 4C_\rho^3 R^2 \log(1/\delta)}{c_\rho^2}$  and  $\mu_s = c \cdot \frac{2C_\rho}{c_\rho^2}$ .

□

**Lemma 8** (GD condition for robust regression). Consider the robust regression setup of Section 3.

- When  $\|\cdot\|/\|\cdot\|_*$  are any dual norm pair, we have  $\left(1, \frac{BC_\rho}{c_\rho}\right)$ -GD:

$$L_{\mathcal{D}}(w) - L_{\mathcal{D}}(w^*) \leq \frac{BC_\rho}{c_\rho} \left\| \nabla L_{\mathcal{D}}(w) \right\| \quad \forall w \in \mathcal{W}. \quad (23)$$

- In the  $\ell_2/\ell_2$  setup, we have  $\left(2, \frac{C_\rho}{2c_\rho^2\lambda_{\min}(\Sigma)}\right)$ -GD:

$$L_{\mathcal{D}}(w) - L_{\mathcal{D}}(w^*) \leq \frac{C_\rho}{2c_\rho^2\lambda_{\min}(\Sigma)} \|\nabla L_{\mathcal{D}}(w)\|_2^2 \quad \forall w \in \mathcal{W}. \quad (24)$$

- In the sparse  $\ell_\infty/\ell_1$  setup, where  $\|w^*\|_0 \leq s$ , we have  $\left(2, \frac{2C_\rho s}{c_\rho^2\psi_{\min}(\Sigma)}\right)$ -GD:

$$L_{\mathcal{D}}(w) - L_{\mathcal{D}}(w^*) \leq \frac{2C_\rho s}{c_\rho^2\psi_{\min}(\Sigma)} \|\nabla L_{\mathcal{D}}(w)\|_\infty^2 \quad \forall w \in \mathcal{W}. \quad (25)$$

**Proof of Lemma 8.**

**Excess risk upper bound.** To begin, smoothness of  $\rho$  implies that for any  $s, s^* \in \mathcal{S}$  we have

$$\rho(s) - \rho(s^*) \leq \rho'(s^*)(s - s^*) + \frac{C_\rho}{2}(s - s^*)^2.$$

Since this holds point-wise, we use it to derive the following in-expectation bound

$$\begin{aligned} L_{\mathcal{D}}(w) - L_{\mathcal{D}}(w^*) &\leq \mathbb{E}_{x,y}[\rho(\langle w^*, x \rangle - y)\langle w - w^*, x \rangle] + \frac{C_\rho}{2} \mathbb{E}\langle w - w^*, x \rangle^2 \\ &= \langle \nabla L_{\mathcal{D}}(w^*), w - w^* \rangle + \frac{C_\rho}{2} \mathbb{E}\langle w - w^*, x \rangle^2. \end{aligned}$$

Note however that

$$\nabla L_{\mathcal{D}}(w^*) = \mathbb{E}_{x,\zeta}[\rho'(-\zeta)x] = 0,$$

since  $\zeta$  is conditionally symmetric and  $\rho'$  is odd. We therefore have

$$L_{\mathcal{D}}(w) - L_{\mathcal{D}}(w^*) \leq \frac{C_\rho}{2} \mathbb{E}\langle w - w^*, x \rangle^2.$$

On the other hand, using the form of the gradient we have

$$\begin{aligned} \langle L_{\mathcal{D}}(w), w - w^* \rangle &= \mathbb{E}_x[\mathbb{E}_\zeta \rho'(\langle w - w^*, x \rangle - \zeta)\langle w - w^*, x \rangle] \\ &= \mathbb{E}_x[h(\langle w - w^*, x \rangle)\langle w - w^*, x \rangle]. \end{aligned}$$

To lower bound the term inside the expectation, consider a particular draw of  $x$  and assume  $\langle w - w^*, x \rangle \geq 0$ ; this is admissible because  $h$ , like  $\rho'$ , is odd. Then we have

$$h(\langle w - w^*, x \rangle)\langle w - w^*, x \rangle = \frac{h(\langle w - w^*, x \rangle)}{\langle w - w^*, x \rangle} \langle w - w^*, x \rangle^2 \geq c_\rho \langle w - w^*, x \rangle^2,$$

where the last line follows because  $h(0) = 0$  and  $h'(0) > c_\rho$ . Since this holds pointwise, we simply take the expectation to show that

$$\langle \nabla L_{\mathcal{D}}(w), w - w^* \rangle \geq c_\rho \mathbb{E}\langle w - w^*, x \rangle^2, \quad (26)$$

and consequently the excess risk is bounded by

$$L_{\mathcal{D}}(w) - L_{\mathcal{D}}(w^*) \leq \frac{C_\rho}{2c_\rho} \langle \nabla L_{\mathcal{D}}(w), w - w^* \rangle. \quad (27)$$

**Proving the GD conditions.** We now use (27) to establish the GD condition variants.

- $\left(1, \frac{BC_\rho}{c_\rho}\right)$ -GD:

Use Hölder's inequality to obtain the upper bound,

$$\langle \nabla L_{\mathcal{D}}(w), w - w^* \rangle \leq 2B \|\nabla L_{\mathcal{D}}(w)\|.$$



- $\left(2, \frac{C_\rho}{2c_\rho^2\lambda_{\min}(\Sigma)}\right)$ -GD:

Begin with

$$L_{\mathcal{D}}(w) - L_{\mathcal{D}}(w^*) \leq \frac{C_\rho}{2c_\rho} \langle \nabla L_{\mathcal{D}}(w), w - w^* \rangle.$$

Using the same reasoning as in [Lemma 5](#), this is upper bounded by

$$\leq \frac{C_\rho}{2c_\rho} \|\nabla L_{\mathcal{D}}(w)\|_2 \cdot \|P_{\mathcal{X}}(w - w^*)\|_2, \quad (28)$$

where  $P_{\mathcal{X}}$  denotes the orthogonal projection onto  $\text{span}(\Sigma)$ .

Recalling [\(26\)](#), it also holds that

$$\begin{aligned} \langle P_{\mathcal{X}} \nabla L_{\mathcal{D}}(w), P_{\mathcal{X}}(w - w^*) \rangle &= \langle \nabla L_{\mathcal{D}}(w), w - w^* \rangle \geq c_\rho \mathbb{E}_x \langle w - w^*, x \rangle^2 \\ &= c_\rho \langle w - w^*, \mathbb{E}_x [xx^T] (w - w^*) \rangle \\ &= c_\rho \langle w - w^*, \Sigma(w - w^*) \rangle \\ &\geq c_\rho \lambda_{\min}(\Sigma) \|P_{\mathcal{X}}(w - w^*)\|_2^2. \end{aligned} \quad (29)$$

Rearranging and applying Cauchy-Schwarz, we have

$$\|P_{\mathcal{X}}(w - w^*)\|_2 \leq \frac{1}{c_\rho \lambda_{\min}(\Sigma)} \cdot \|\nabla L_{\mathcal{D}}(w)\|_2.$$

Combining this inequality with [\(28\)](#), we have

$$L_{\mathcal{D}}(w) - L_{\mathcal{D}}(w^*) \leq \frac{C_\rho}{2c_\rho^2 \lambda_{\min}(\Sigma)} \cdot \|\nabla L_{\mathcal{D}}(w)\|_2^2.$$

- $\left(2, \frac{2C_\rho s}{c_\rho^2 \psi_{\min}(\Sigma)}\right)$ -GD:

Using the inequality [\(29\)](#) from the  $\ell_2/\ell_2$  GD condition proof above

$$\langle \nabla L_{\mathcal{D}}(w), w - w^* \rangle \geq c_\rho \langle w - w^*, \Sigma(w - w^*) \rangle.$$

By the assumption that  $\|w\|_1 \leq \|w^*\|_1$ , we apply [Lemma 6](#) to conclude that 1)  $w - w^* \in \mathcal{C}(S(w^*), 1)$  and 2)  $\|w - w^*\|_1 \leq 2\sqrt{s}\|w - w^*\|_2$ , and so

$$\langle w - w^*, \Sigma(w - w^*) \rangle \geq \psi_{\min}(\Sigma) \|w - w^*\|_2^2.$$

Rearranging, and applying the  $\|w - w^*\|_1 \leq 2\sqrt{s}\|w - w^*\|_2$  inequality:

$$\begin{aligned} \|w - w^*\|_2 &\leq \frac{1}{c_\rho \psi_{\min}(\Sigma)} \frac{\langle \nabla L_{\mathcal{D}}(w), w - w^* \rangle}{\|w - w^*\|_2} \\ &\leq \frac{1}{c_\rho \psi_{\min}(\Sigma)} \frac{\|\nabla L_{\mathcal{D}}(w)\|_\infty \|w - w^*\|_1}{\|w - w^*\|_2} \\ &\leq \frac{2\sqrt{s}}{c_\rho \psi_{\min}(\Sigma)} \|\nabla L_{\mathcal{D}}(w)\|_\infty. \end{aligned}$$

Finally, from [\(27\)](#) we have

$$\begin{aligned} L_{\mathcal{D}}(w) - L_{\mathcal{D}}(w^*) &\leq \frac{C_\rho}{2c_\rho} \langle \nabla L_{\mathcal{D}}(w), w - w^* \rangle \\ &\leq \frac{C_\rho}{2c_\rho} \|\nabla L_{\mathcal{D}}(w)\|_\infty \|w - w^*\|_1 \\ &\leq \frac{C_\rho \sqrt{s}}{c_\rho} \|\nabla L_{\mathcal{D}}(w)\|_\infty \|w - w^*\|_2. \end{aligned}$$

Combining the two inequalities gives the final result.

□

**Lemma 9.** Let the norm  $\|\cdot\|$  satisfy the smoothness property (see [Theorem 7](#)) with constant  $\beta$ . Then the gradient for robust regression satisfies the following normed Rademacher complexity bound:

$$\mathbb{E}_\epsilon \sup_{w \in \mathcal{W}} \left\| \sum_{t=1}^n \epsilon_t \nabla \ell(w; x_t, y_t) \right\| \leq O\left(BR^2 C_\rho \sqrt{\beta n}\right). \quad (30)$$

**Proof of Lemma 9.** Let  $G_t(s) = \rho(s - y_t)$  and  $F_t(w) = \langle w, x_t \rangle$ , so that  $\ell(w; x_t, y_t) = G_t(F_t(w))$ . Then  $G'_t(s) = \rho'(s - y_t)$  and  $\nabla F_t(w) = x_t$ , so our assumptions imply that  $|G'_t(s)| \leq C_\rho$  and  $\|\nabla F_t(w)\| \leq R$ . We apply [Theorem 1](#) to conclude

$$\mathbb{E}_\epsilon \sup_{w \in \mathcal{W}} \left\| \sum_{t=1}^n \epsilon_t \nabla \ell(w; x_t, y_t) \right\| \leq 2R \mathbb{E}_\epsilon \sup_{w \in \mathcal{W}} \sum_{t=1}^n \epsilon_t G'_t(\langle w, x_t \rangle) + 2C_\rho \mathbb{E}_\epsilon \left\| \sum_{t=1}^n \epsilon_t x_t \right\|.$$

For the first term on the left-hand side, we have that for any  $s$ ,  $|G''_t(s)| = 2|\rho''(s - y_t)| \leq 2C_\rho$ , so  $G'_t$  is  $2C_\rho$ -Lipschitz. Then the by scalar contraction for Rademacher complexity ([Lemma 1](#)),

$$\mathbb{E}_\epsilon \sup_{w \in \mathcal{W}} \sum_{t=1}^n \epsilon_t G'_t(\langle w, x_t \rangle) \leq 2C_\rho \mathbb{E}_\epsilon \sup_{w \in \mathcal{W}} \sum_{t=1}^n \epsilon_t \langle w, x_t \rangle = 2C_\rho B \mathbb{E}_\epsilon \left\| \sum_{t=1}^n \epsilon_t x_t \right\|.$$

Finally, the smoothness assumption on the norm (via [Theorem 7](#)) implies

$$\mathbb{E}_\epsilon \left\| \sum_{t=1}^n \epsilon_t x_t \right\| \leq \sqrt{2\beta R^2 n}.$$

□

**Proof of Proposition 3.** Observe that [Assumption 1](#) and [Assumption 2](#) respectively imply that  $\|\nabla L_{\mathcal{D}}(w^*)\| = 0$  for the GLM and RR settings. Begin by invoking [Theorem 3](#). It is immediate that any algorithm that guarantees  $\mathbb{E} \|\nabla \widehat{L}_n(\widehat{w}^{\text{alg}})\| \leq 1/\sqrt{n}$  will obtain the claimed sample complexity bound (the high-probability statement [Theorem 3](#) immediately yields an in-expectation statement due to boundedness), so all we must do is verify that such a point exists. [Proposition 2](#) along with [Lemma 7](#) and [Lemma 9](#) respectively indeed imply that  $\|\nabla \widehat{L}_n(w^*)\|_2 \leq C/\sqrt{n}$  for both settings.

For completeness, we show below that both models indeed have Lipschitz gradients, and so standard smooth optimizers can be applied to the empirical loss.

*Generalized Linear Model.* Observe that for any  $(x, y)$  pair we have

$$\|\nabla \ell(w; x, y) - \nabla \ell(w'; x, y)\|_2 = 2\|x\|_2 |(\sigma(\langle w, x \rangle) - y)\sigma'(\langle w, x \rangle) - (\sigma(\langle w', x \rangle) - y)\sigma'(\langle w', x \rangle)|.$$

Letting  $f(s) = (\sigma(s) - y)\sigma'(s)$ , we see that the assumption on the loss guarantees  $|f'(s)| \leq 3C_\sigma^2$ , so we have

$$\|\nabla \ell(w; x, y) - \nabla \ell(w'; x, y)\|_2 \leq 6C_\sigma^2 R |\langle w - w', x \rangle| \leq 6C_\sigma^2 R^2 \|w - w'\|_2,$$

so smoothness is established.

*Robust Regression.* Following a similar calculation to the GLM case, we have

$$\begin{aligned} \|\nabla \ell(w; x, y) - \nabla \ell(w'; x, y)\|_2 &= \|x\|_2 |\rho'(\langle w, x \rangle - y) - \rho'(\langle w', x \rangle - y)| \\ &\leq C_\rho \|x\|_2 |\langle w - w', x \rangle| \\ &\leq C_\rho \|x\|_2^2 \|w - w'\|_2 \\ &\leq C_\rho R^2 \|w - w'\|_2. \end{aligned}$$

Now let  $f(s) = (\sigma(s) - y)\sigma'(s)$ , and observe that  $|f'(s)| \leq 3C_\sigma^2$ , so we have

$$\|\nabla \ell(w; x, y) - \nabla \ell(w'; x, y)\|_2 \leq 6C_\sigma^2 R |\langle w - w', x \rangle| \leq 6C_\sigma^2 R^2 \|w - w'\|_2.$$

□

### C.3 Further Discussion

**Detailed comparison with [31]** We now sketch in more detail the relation between the rates of Theorem 3 and Theorem 4 and those of [31]. We focus on the fast rate regime, and on the case  $R = \sqrt{d}$  (e.g., when  $x \sim \mathcal{N}(0, I_{d \times d})$ ).

- *Uniform convergence.* Their uniform convergence bounds scale as  $O(\tau\sqrt{d/n})$ , where  $\tau$  is the subgaussian parameter for the data  $x$ , whereas our uniform convergence bounds scale as  $O(R^2\sqrt{1/n})$ . When  $R = \sqrt{d}$  both bounds scale as  $O(d\sqrt{1/n})$ , but our bounds do not depend on  $d$  when  $R$  is constant, whereas their bound always pays  $\sqrt{d}$ .
- *Parameter convergence.* The final result of [31] is a parameter convergence bound of the form  $\|\widehat{w}^{\text{alg}} - w^*\|_2 \leq O\left(\frac{\tau}{\gamma\tau^2} \sqrt{\frac{d}{n}}\right)$  (see Theorem 4/6; Eqs. (106) and (96)). Our main result for the “low-dimensional” setup in Theorem 3 and Theorem 4 is an excess risk bound of the form  $L_{\mathcal{D}}(\widehat{w}^{\text{alg}}) - L_{\mathcal{D}}(w^*) \leq O\left(\frac{R^4}{\lambda_{\min}(\Sigma)n}\right)$  which implies a parameter convergence bound of  $\|\widehat{w}^{\text{alg}} - w^*\|_2 \leq \frac{R^2}{\lambda_{\min}(\Sigma)\sqrt{n}}$  (using similar reasoning as in the proof of Lemma 5 and Lemma 8). With  $\tau = R = \sqrt{d}$  and Assumptions 6 and 9 in [31], we have  $\lambda_{\min}(\Sigma) = \underline{\gamma}\tau^2$ , and so again both the bounds resolve to  $O\left(\frac{d}{\lambda_{\min}(\Sigma)\sqrt{n}}\right)$ .

**Analysis of regularized stationary point finding for high-dimensional setting** Here we show that any algorithm that finds a stationary point of the regularized empirical loss generically succeeds obtains optimal sample complexity in the high-dimensional/norm-based setting. We focus on the generalized linear model in the Euclidean setting.

Let  $r(w) = \frac{\lambda}{2}\|w\|_2^2$ . Define  $L_{\mathcal{D}}^{\lambda}(w) = L_{\mathcal{D}}(w) + r(w)$  and  $\widehat{L}_n^{\lambda}(w) = \widehat{L}_n(w) + r(w)$ . We consider any algorithm that returns a point  $\widehat{w}$  with  $\nabla \widehat{L}_n^{\lambda}(\widehat{w}) = 0$ , i.e. any stationary point of the regularized empirical risk.

**Theorem 9.** *Consider the generalized linear model setting. Let  $\widehat{w}$  be any point with  $\nabla \widehat{L}_n^{\lambda}(\widehat{w}) = 0$ . Suppose that  $\|w^*\|_2 = 1$  and  $C_{\sigma}, R > 1$ . Then there is some absolute constant  $c > 0$  such that for any fixed  $\delta > 0$ , if the regularization parameter  $\lambda$  satisfies*

$$\lambda > c \cdot \sqrt{\frac{R^4 C_{\sigma}^6}{c_{\sigma}^2} \cdot \frac{\log(\log(C_{\sigma} R n)/\delta)}{n}},$$

*then with probability at least  $1 - \delta$ ,*

$$L_{\mathcal{D}}(\widehat{w}) - L_{\mathcal{D}}(w^*) \leq O\left(\frac{R^2 C_{\sigma}^4}{c_{\sigma}^2} \cdot \sqrt{\frac{\log(\log(C_{\sigma} R n)/\delta)}{n}}\right).$$

Theorem 9 easily extends to the robust regression setting by replacing invocations of Lemma 7 with Lemma 9 and use of (18) with (27).

**Proof of Theorem 9.** Recall that  $w^*$  minimizes the *unregularized* population risk, and that  $\|w^*\|_2 = 1$ . The technical challenge is to apply Lemma 7 even though we lack a good a-priori upper bound on the norm of  $\widehat{w}$ . We proceed by splitting the analysis into two cases. The idea is that if  $\|\widehat{w}\|_2 \leq \|w^*\|_2$  we can apply Lemma 7 directly with no additional difficulty. On other hand, when  $\|\widehat{w}\|_2 \geq \|w^*\|_2$  the regularized population risk satisfies the  $(2, O(1/\lambda))$ -GD inequality, which is enough to show that excess risk is small even though  $\|\widehat{w}\|_2$  could be larger than  $\|w^*\|_2$ .

**Case 1:**  $\|\widehat{w}\|_2 \geq \|w^*\|_2$ .

Let  $\widetilde{W} = \{w \in \mathbb{R}^d \mid \|w\|_2 \geq \|w^*\|_2\}$ , so that  $\widehat{w} \in \widetilde{W}$ . Observe that since  $r(w)$  is  $\lambda$ -strongly convex it satisfies  $r(w) - r(w^*) \leq \langle \nabla r(w), w - w^* \rangle - \frac{\lambda}{2}\|w - w^*\|_2^2$  for all  $w$ . Moreover, if  $w \in \widetilde{W}$ , we have

$$\langle \nabla r(w), w - w^* \rangle \geq r(w) - r(w^*) + \frac{\lambda}{2}\|w - w^*\|_2^2 \geq 0.$$

Using (18) and the definition of  $w^*$ , along with the strong convexity of  $r$ , we get

$$L_{\mathcal{D}}^{\lambda}(w) - L_{\mathcal{D}}^{\lambda}(w^*) \leq \frac{C_{\sigma}}{2c_{\sigma}} \langle \nabla L_{\mathcal{D}}(w), w - w^* \rangle + \langle \nabla r(w), w - w^* \rangle - \frac{\lambda}{2} \|w - w^*\|_2^2.$$

Since  $\langle \nabla L_{\mathcal{D}}(w), w - w^* \rangle \geq 0$ , this is upper bounded by

$$L_{\mathcal{D}}^{\lambda}(w) - L_{\mathcal{D}}^{\lambda}(w^*) \leq \frac{C_{\sigma}}{c_{\sigma}} \langle \nabla L_{\mathcal{D}}(w), w - w^* \rangle + \langle \nabla r(w), w - w^* \rangle - \frac{\lambda}{2} \|w - w^*\|_2^2.$$

Using the non-negativity of  $\langle \nabla r(w), w - w^* \rangle$  over  $\widetilde{W}$ , and that  $C_{\sigma}/c_{\sigma} > 1$ , this implies

$$L_{\mathcal{D}}^{\lambda}(w) - L_{\mathcal{D}}^{\lambda}(w^*) \leq \frac{C_{\sigma}}{c_{\sigma}} \langle \nabla L_{\mathcal{D}}^{\lambda}(w), w - w^* \rangle - \frac{\lambda}{2} \|w - w^*\|_2^2 \quad \forall w \in \widetilde{W}.$$

Applying Cauchy-Schwarz:

$$\leq \frac{C_{\sigma}}{c_{\sigma}} \|\nabla L_{\mathcal{D}}^{\lambda}(w)\|_2 \|w - w^*\|_2 - \frac{\lambda}{2} \|w - w^*\|_2^2 \quad \forall w \in \widetilde{W}.$$

Using the AM-GM inequality:

$$\leq \frac{C_{\sigma}^2}{c_{\sigma}^2 \lambda} \|\nabla L_{\mathcal{D}}^{\lambda}(w)\|_2^2 \quad \forall w \in \widetilde{W}.$$

Using that  $\widehat{w} \in \widetilde{W}$ , and that  $\nabla \widehat{L}_n^{\lambda}(\widehat{w}) = 0$ , we have

$$L_{\mathcal{D}}^{\lambda}(\widehat{w}) - L_{\mathcal{D}}^{\lambda}(w^*) \leq \frac{C_{\sigma}^2}{c_{\sigma}^2 \lambda} \|\nabla L_{\mathcal{D}}^{\lambda}(\widehat{w}) - \nabla \widehat{L}_n^{\lambda}(\widehat{w})\|_2^2. \quad (31)$$

Observe that since  $\widehat{w}$  is a stationary point of the empirical risk,  $\nabla \widehat{L}_n(\widehat{w}) = -\lambda \widehat{w}$ , and so  $\|\widehat{w}\|_2 \leq \frac{1}{\lambda} \|\nabla \widehat{L}_n(\widehat{w})\|_2 \leq \frac{2C_{\sigma}R}{\lambda}$  with probability 1. Thus, if we apply Lemma 10 with  $B_{\max} = \frac{2C_{\sigma}R}{\lambda}$ , we get that with probability at least  $1 - \delta$ ,

$$\|\nabla L_{\mathcal{D}}^{\lambda}(\widehat{w}) - \nabla \widehat{L}_n^{\lambda}(\widehat{w})\|_2 \leq O\left(\|\widehat{w}\|_2 R^2 C_{\sigma}^2 \sqrt{\frac{1}{n}} + C_{\sigma} R \sqrt{\frac{\log(\log(C_{\sigma}R/\lambda)/\delta)}{n}}\right),$$

where we have used additionally that the regularization term does not depend on data. Combining this bound with (31), and using that  $\widehat{w} \in \widetilde{W}$  and the elementary inequality  $(a + b)^2 \leq 2(a^2 + b^2)$ , we see that there exist constants  $c, c' > 0$  such that

$$L_{\mathcal{D}}^{\lambda}(\widehat{w}) - L_{\mathcal{D}}^{\lambda}(w^*) \leq c \cdot \|\widehat{w}\|_2^2 \cdot \frac{R^4 C_{\sigma}^6}{\lambda c_{\sigma}^2} \cdot \frac{1}{n} + c' \cdot \frac{R^2 C_{\sigma}^4}{\lambda c_{\sigma}^2} \cdot \frac{\log(\log(C_{\sigma}R/\lambda)/\delta)}{n}.$$

Expanding the definition of the regularized excess risk, this is equivalent to

$$L_{\mathcal{D}}(\widehat{w}) - L_{\mathcal{D}}(w^*) \leq \lambda + \|\widehat{w}\|_2^2 \cdot \left(c \cdot \frac{R^4 C_{\sigma}^6}{\lambda c_{\sigma}^2} \cdot \frac{1}{n} - \lambda\right) + c' \cdot \frac{R^2 C_{\sigma}^4}{\lambda c_{\sigma}^2} \cdot \frac{\log(\log(C_{\sigma}R/\lambda)/\delta)}{n}.$$

Observe that if  $\lambda > \sqrt{c \cdot \frac{R^4 C_{\sigma}^6}{c_{\sigma}^2} \cdot \frac{1}{n}}$  the middle term in this expression is at most zero. We choose

$$\lambda > \sqrt{c \cdot \frac{R^4 C_{\sigma}^6}{c_{\sigma}^2} \cdot \frac{\log(\log(C_{\sigma}Rn)/\delta)}{n}}.$$

Substituting choice this into the expression above leads to a final bound of

$$L_{\mathcal{D}}(\widehat{w}) - L_{\mathcal{D}}(w^*) \leq O\left(\frac{R^2 C_{\sigma}^3}{c_{\sigma}} \cdot \sqrt{\frac{\log(\log(C_{\sigma}Rn)/\delta)}{n}}\right).$$

**Case 2:**  $\|\hat{w}\|_2 \leq \|w^*\|_2$ .

Recall that  $\nabla \widehat{L}_n^\lambda(\hat{w}) = 0$ . This implies  $\nabla \widehat{L}_n(\hat{w}) = -\lambda \hat{w}$ , and so  $\|\nabla \widehat{L}_n(\hat{w})\|_2 \leq \lambda \|\hat{w}\|_2 \leq \lambda$ . Using (18) we have

$$L_{\mathcal{D}}(\hat{w}) - L_{\mathcal{D}}(w^*) \leq \frac{C_\sigma}{2c_\sigma} \langle \nabla L_{\mathcal{D}}(\hat{w}), \hat{w} - w^* \rangle \leq \frac{C_\sigma}{c_\sigma} \|\nabla L_{\mathcal{D}}(\hat{w})\|_2.$$

Using the bound on the empirical gradient above, we get

$$\|\nabla L_{\mathcal{D}}(\hat{w})\|_2 \leq \lambda + \|\nabla L_{\mathcal{D}}(\hat{w}) - \nabla \widehat{L}_n(\hat{w})\|_2.$$

Using (12), (13), and Lemma 7, applied with  $B = 1$ , we have that with probability at least  $1 - \delta$ ,

$$\|\nabla L_{\mathcal{D}}(\hat{w}) - \nabla \widehat{L}_n(\hat{w})\|_2 \leq O\left(R^2 C_\sigma^2 \sqrt{\frac{\log(1/\delta)}{n}}\right),$$

and so

$$L_{\mathcal{D}}(\hat{w}) - L_{\mathcal{D}}(w^*) \leq O\left(\lambda \frac{C_\sigma}{c_\sigma} + \frac{R^2 C_\sigma^3}{c_\sigma} \sqrt{\frac{\log(1/\delta)}{n}}\right).$$

Substituting in the choice for  $\lambda$ :

$$\leq O\left(\frac{R^2 C_\sigma^4}{c_\sigma^2} \cdot \sqrt{\frac{\log(\log(C_\sigma R n)/\delta)}{n}}\right).$$

□

**Lemma 10.** Let  $L_{\mathcal{D}}$  and  $\widehat{L}_n$  be the population and empirical risk for the generalized linear model setting. Let a parameter  $B_{\max} \geq 1$  be given. Then with probability at least  $1 - \delta$ , for all  $w \in \mathbb{R}^d$  with  $1 \leq \|w\|_2 \leq B_{\max}$ ,

$$\|\nabla L_{\mathcal{D}}(w) - \nabla \widehat{L}_n(w)\|_2 \leq O\left(\|w\|_2 R^2 C_\sigma^2 \sqrt{\frac{1}{n}} + C_\sigma R \sqrt{\frac{\log(\log(B_{\max})/\delta)}{n}}\right),$$

where all constants are as in Assumption 1.

**Proof.** (12), (13), and Lemma 7 imply that for any fixed  $B$ , with probability at least  $1 - \delta$ ,

$$\sup_{w: \|w\|_2 \leq B} \|\nabla L_{\mathcal{D}}(w) - \nabla \widehat{L}_n(w)\| \leq O\left(B R^2 C_\sigma^2 \sqrt{\frac{1}{n}} + C_\sigma R \sqrt{\frac{\log(\frac{1}{\delta})}{n}}\right).$$

Define  $B_i = e^{i-1}$  for  $1 \leq i \leq \lceil \log(B_{\max}) \rceil + 1$ . The via a union bound, we have that for all  $i$  simultaneously,

$$\sup_{w: \|w\|_2 \leq B_i} \|\nabla L_{\mathcal{D}}(w) - \nabla \widehat{L}_n(w)\| \leq O\left(B_i R^2 C_\sigma^2 \sqrt{\frac{1}{n}} + C_\sigma R \sqrt{\frac{\log(\log(B_{\max})/\delta)}{n}}\right).$$

In particular, for any fixed  $w$  with  $1 \leq \|w\|_2 \leq B_{\max}$ , if we take  $i$  to be the smallest index for which  $\|w\|_2 \leq B_i$ , the expression above implies

$$\|\nabla L_{\mathcal{D}}(w) - \nabla \widehat{L}_n(w)\|_2 \leq O\left(\|w\|_2 R^2 C_\sigma^2 \sqrt{\frac{1}{n}} + C_\sigma R \sqrt{\frac{\log(\log(B_{\max})/\delta)}{n}}\right),$$

since  $B_i \leq e\|w\|_2$ .

□

**Analysis of mirror descent for high-dimensional setting.** Here we show that mirror descent obtains optimal excess risk for the norm-based/high-dimensional regime in [Theorem 3](#) and [Theorem 4](#).

Our approach is to run mirror descent with  $\Psi^*$  as the regularizer. Observe that  $\Psi^*$  is  $\frac{1}{\beta}$ -strongly convex with respect to the dual norm  $\|\cdot\|_*$ , and that we have  $\|\nabla \ell(w; x, y)\| \leq 2C_\sigma R$  for the GLM setting and  $\|\nabla \ell(w; x, y)\| \leq C_\rho R$  for the RR setting.

Focusing on the GLM, if we take a single pass over the entire dataset  $\{(x_t, y_t)\}_{t=1}^n$  in order, the standard analysis for mirror descent starting at  $w_1 = 0$  with optimal learning rate tuning [\[15\]](#) guarantees that the following inequality holds deterministically:

$$\frac{1}{n} \sum_{t=1}^n \langle \nabla \ell(w_t; x_t, y_t), w_t - w^* \rangle \leq O\left(RBC_\sigma \sqrt{\frac{\beta}{n}}\right).$$

Since each point is visited a single time, this leads to the following guarantee on the population loss in expectation

$$\mathbb{E}\left[\frac{1}{n} \sum_{t=1}^n \langle \nabla L_{\mathcal{D}}(w_t), w_t - w^* \rangle\right] \leq O\left(RBC_\sigma \sqrt{\frac{\beta}{n}}\right).$$

Consequently, if we define  $\widehat{w}$  to be the result of choosing a single time  $t \in [n]$  uniformly at random and returning  $w_t$ , this implies that

$$\mathbb{E}[\langle \nabla L_{\mathcal{D}}(\widehat{w}), \widehat{w} - w^* \rangle] \leq O\left(RBC_\sigma \sqrt{\frac{\beta}{n}}\right).$$

Combining this inequality with [\(18\)](#), we have

$$\mathbb{E}[L_{\mathcal{D}}(\widehat{w}) - L_{\mathcal{D}}(w^*)] \leq O\left(RB \frac{C_\sigma^2}{c_\sigma} \sqrt{\frac{\beta}{n}}\right).$$

Likewise, combining the mirror descent upper bound with [\(27\)](#) leads to a rate of  $O\left(RB \frac{C_\rho^2}{c_\rho} \sqrt{\frac{\beta}{n}}\right)$  for robust regression. Thus, when all parameters involved are constant, it suffices to take  $n = \frac{1}{\varepsilon^2}$  to obtain  $O(\varepsilon)$  excess risk in both settings.

## D Proofs from [Section 4](#)

**Proof of [Theorem 5](#).** Let  $B \in \mathbb{R}^{d \times d}$  be a matrix for which the  $i$ th row  $B_i$  is given by  $B_i = \frac{1}{\sqrt{d}}(\mathbf{1} - e_i)$ .

We first focus on the more technical case where  $n \geq d$ .

Let  $n = N \cdot d$  for some odd  $N \in \mathbb{N}$ . We partition time into  $d$  consecutive segments:  $S_1 = \{1, \dots, N\}$ ,  $S_2 = \{N+1, \dots, 2N\}$  and on. The sequence of instances  $x_{1:n}$  we will use will be to set  $x_t = B_i$  for  $t \in S_i$ . Note that  $\|B_i\|_2 \leq 1$ , so this choice indeed satisfies the boundedness constraint.

For simplicity, assume that  $y_t = -1$  for all  $t \in [n]$ . Then it holds that

$$\begin{aligned} \mathbb{E}_\epsilon \sup_{w \in \mathcal{W}} \left\| \sum_{t=1}^n \epsilon_t \nabla \ell(w; x_t, y_t) \right\|_2 &= \mathbb{E}_\epsilon \sup_{w \in \mathcal{W}} \left\| \sum_{t=1}^n \epsilon_t \mathbb{1}\{\langle w, x_t \rangle \geq 0\} x_t \right\|_2 \\ &= \mathbb{E}_\epsilon \sup_{w \in \mathcal{W}} \left\| \sum_{i=1}^d \mathbb{1}\{\langle w, B_i \rangle \geq 0\} \sum_{t \in S_i} \epsilon_t x_t \right\|_2 \end{aligned}$$

We introduce the notation  $\varphi_i = \sum_{t \in S_i} \epsilon_t$ .

$$\begin{aligned} &= \mathbb{E}_\varphi \sup_{w \in \mathcal{W}} \left\| \sum_{i=1}^d \mathbb{1}\{\langle w, B_i \rangle \geq 0\} \varphi_i B_i \right\|_2 \\ &= \mathbb{E}_\varphi \sup_{w \in \mathcal{W}} \left\| \sum_{i=1}^d \mathbb{1}\{\langle w, B_i \rangle \geq 0\} \varphi_i \frac{1}{\sqrt{d}}(\mathbf{1} - e_i) \right\|_2 \end{aligned}$$

Using triangle inequality:

$$\begin{aligned}
&\geq \mathbb{E}_\varphi \sup_{w \in \mathcal{W}} \left\| \sum_{i=1}^d \mathbb{1}\{\langle w, B_i \rangle \geq 0\} \varphi_i \frac{1}{\sqrt{d}} \mathbf{1} \right\|_2 - \frac{1}{\sqrt{d}} \mathbb{E}_\varphi \sum_{i=1}^d |\varphi_i| \\
&= \mathbb{E}_\varphi \sup_{w \in \mathcal{W}} \left| \sum_{i=1}^d \mathbb{1}\{\langle w, B_i \rangle \geq 0\} \varphi_i \right| - \frac{1}{\sqrt{d}} \mathbb{E}_\varphi \sum_{i=1}^d |\varphi_i| \\
&\geq \mathbb{E}_\varphi \sup_{w \in \mathcal{W}} \left| \sum_{i=1}^d \mathbb{1}\{\langle w, B_i \rangle \geq 0\} \varphi_i \right| - O(\sqrt{n}).
\end{aligned}$$

Now, for a given draw of  $\varphi$ , we choose  $w \in \mathcal{W}$  such that  $\text{sgn}(\langle w, B_i \rangle) = \text{sgn}(\varphi_i)$ . The key trick here is that  $B$  is invertible, so for a given sign pattern, say  $\sigma \in \{\pm 1\}^d$ , we can set  $\tilde{w} = B^{-1}\sigma$  and then  $w = \tilde{w}/\|\tilde{w}\|_2$  to achieve this pattern. To see that  $B$  is invertible, observe that we can write it as  $B = \frac{1}{\sqrt{d}}(\mathbf{1}\mathbf{1}^\top - I)$ . The identity matrix can itself be written as  $\frac{1}{d}\mathbf{1}\mathbf{1}^\top + A_\perp$ , where  $\mathbf{1} \notin \text{span}(A_\perp)$ , so it can be seen that  $B = \frac{1}{\sqrt{d}}((1 - \frac{1}{d})\mathbf{1}\mathbf{1}^\top - A_\perp)$ , and that the  $\mathbf{1}\mathbf{1}^\top$  component is preserved by this addition.

We have now arrived at a lower bound of  $\mathbb{E}_\varphi \left| \sum_{i=1}^d \mathbb{1}\{\text{sgn}(\varphi_i) \geq 0\} \varphi_i \right|$ . This value is lower bounded by

$$\begin{aligned}
&\mathbb{E}_\varphi \left| \sum_{i=1}^d \mathbb{1}\{\text{sgn}(\varphi_i) \geq 0\} \varphi_i \right| \\
&= \mathbb{E}_\varphi \sum_{i=1}^d \mathbb{1}\{\text{sgn}(\varphi_i) \geq 0\} |\varphi_i|
\end{aligned}$$

Now, observe that since  $N$  is odd we have  $\text{sgn}(\varphi_i) \in \{\pm 1\}$ , and so  $\mathbb{1}\{\text{sgn}(\varphi_i) \geq 0\} = (1 + \text{sgn}(\varphi_i))/2$ . Furthermore, since  $\varphi_i$  is symmetric, we may replace  $\text{sgn}(\varphi_i)$  with an independent Rademacher random variable  $\sigma_i$

$$\begin{aligned}
&= \mathbb{E}_\varphi \mathbb{E}_\sigma \frac{1}{2} \sum_{i=1}^d (1 + \sigma_i) |\varphi_i| \\
&= \mathbb{E}_\varphi \frac{1}{2} \sum_{i=1}^d |\varphi_i|.
\end{aligned}$$

Lastly, the Khintchine inequality implies that  $\mathbb{E}_{\varphi_i} |\varphi_i| \geq \sqrt{N/2}$ , so the final lower bound is  $\Omega(d\sqrt{N}) = \Omega(\sqrt{dn})$ .

In the case where  $d \geq n$ , the argument above easily yields that  $\mathbb{E}_\epsilon \sup_{w \in \mathcal{W}} \left\| \sum_{t=1}^n \epsilon_t \nabla \ell(w; x_t, y_t) \right\|_2 = \Omega(n)$ .

□

## D.1 Proof of Theorem 6

Before proceeding to the proof, let us introduce some auxiliary definitions and results. The following functions will be used throughout the proof. They are related by Lemma 11.

$$\begin{aligned}
\xi_{\mathcal{D}}(w, \gamma) &= \mathbb{E}_{x \sim \mathcal{D}} \mathbb{1}\left\{ \frac{|\langle w, x \rangle|}{\|w\| \|x\|} \leq \gamma \right\}, \\
\widehat{\xi}_n(w, \gamma) &= \frac{1}{n} \sum_{t=1}^n \mathbb{1}\left\{ \frac{|\langle w, x_t \rangle|}{\|w\| \|x_t\|} \leq \gamma \right\}.
\end{aligned}$$

**Lemma 11.** With probability at least  $1 - \delta$ , simultaneously for all  $w \in \mathcal{W}$  and all  $\gamma > 0$ ,

$$\begin{aligned}
\xi_{\mathcal{D}}(w, \gamma) &\leq \widehat{\xi}_n(w, 2\gamma) + \frac{4}{\gamma\sqrt{n}} + \sqrt{\frac{2 \log(\log_2(4/\gamma)/\delta)}{n}}, \\
\widehat{\xi}_n(w, \gamma) &\leq \xi_{\mathcal{D}}(w, 2\gamma) + \frac{4}{\gamma\sqrt{n}} + \sqrt{\frac{2 \log(\log_2(4/\gamma)/\delta)}{n}}.
\end{aligned}$$

**Proof sketch for Lemma 11.** We only sketch the proof here as it follows standard analysis (see Theorem 5 of [20]). The key technique is to introduce a Lipschitz function  $\zeta_\gamma(t)$ :

$$\zeta_\gamma(t) = \begin{cases} 1 & |t| \leq \gamma \\ 2 - |t|/\gamma & \gamma < |t| < 2\gamma \\ 0 & |t| \geq 2\gamma \end{cases}.$$

Observe that  $\zeta_\gamma$  satisfies  $\mathbb{1}\{|t| > \gamma\} \leq \zeta_\gamma(t) \leq \mathbb{1}\{|t| > 2\gamma\}$  for all  $t$ . This sandwiching allows us to bound  $\sup_{w \in \mathcal{W}} \{\xi_{\mathcal{D}}(w, \gamma) - \widehat{\xi}_n(w, 2\gamma)\}$  (and  $\sup_{w \in \mathcal{W}} \{\widehat{\xi}_n(w, \gamma) - \xi_{\mathcal{D}}(w, 2\gamma)\}$ ) by instead bounding the difference between the empirical and population averages of the surrogate  $\zeta_\gamma$ . This is achieved easily using the Lipschitz contraction lemma for Rademacher complexity, and by noting that the Rademacher complexity of the class  $\{x \mapsto \langle w, x \rangle \mid \|w\|_2 \leq 1\}$  is at most  $\sqrt{n}$  whenever data satisfies  $\|x_t\|_2 \leq 1$  for all  $t$ . Finally, a union bound over values of  $\gamma$  in the range  $[0, 1]$  yields the statement.  $\square$

**Proof of Theorem 6.** Let the margin function  $\phi$  and  $\delta > 0$  be fixed. Define functions  $\psi(\cdot)$ ,  $\phi_1(\cdot)$ , and  $\phi_2(\cdot)$  as follows:

$$\begin{aligned} \psi(\gamma) &= \frac{4}{\gamma\sqrt{n}} + \sqrt{\frac{2 \log(\log_2(4/\gamma)/\delta)}{n}} \\ \phi_1(\gamma) &= \phi(2\gamma) + \psi(\gamma) \\ \phi_2(\gamma) &= \phi(4\gamma) + 2\psi(2\gamma). \end{aligned}$$

Now, conditioning on the events of Lemma 11, we have that with probability at least  $1 - \delta$ ,

$$\mathcal{W}(\phi, \widehat{\mathcal{D}}_n) \subseteq \mathcal{W}(\phi_1, \mathcal{D}) \subseteq \mathcal{W}(\phi_2, \widehat{\mathcal{D}}_n). \quad (32)$$

Consequently, we have the upper bound

$$\begin{aligned} \sup_{w \in \mathcal{W}(\phi, \widehat{\mathcal{D}}_n)} \|\nabla L_{\mathcal{D}}(w) - \nabla \widehat{L}_n(w)\|_2 &\leq \sup_{w \in \mathcal{W}(\phi_1, \mathcal{D})} \|\nabla L_{\mathcal{D}}(w) - \nabla \widehat{L}_n(w)\|_2 \\ &\leq 4 \mathbb{E}_\epsilon \sup_{w \in \mathcal{W}(\phi_1, \mathcal{D})} \left\| \frac{1}{n} \sum_{t=1}^n \epsilon_t \nabla \ell(w; x_t, y_t) \right\| + 4 \sqrt{\frac{\log(2/\delta)}{n}} \\ &\leq 4 \mathbb{E}_\epsilon \sup_{w \in \mathcal{W}(\phi_2, \widehat{\mathcal{D}}_n)} \left\| \frac{1}{n} \sum_{t=1}^n \epsilon_t \nabla \ell(w; x_t, y_t) \right\| + 4 \sqrt{\frac{\log(2/\delta)}{n}}, \end{aligned} \quad (33)$$

where the second inequality holds with probability at least  $1 - \delta$  using Lemma 4. The key here is that we are able to apply the standard symmetrization result because we have replaced  $\mathcal{W}(\phi, \widehat{\mathcal{D}}_n)$  with a set that does not depend on data. Next, invoking the chain rule (Theorem 1), we split the Rademacher complexity term above as:

$$\mathbb{E}_\epsilon \sup_{w \in \mathcal{W}(\phi_2, \widehat{\mathcal{D}}_n)} \left\| \frac{1}{n} \sum_{t=1}^n \epsilon_t \nabla \ell(w; x_t, y_t) \right\| \leq \underbrace{2 \mathbb{E}_\epsilon \sup_{w \in \mathcal{W}(\phi_2, \widehat{\mathcal{D}}_n)} \frac{1}{n} \sum_{t=1}^n \epsilon_t \mathbb{1}\{y_t \langle w, x_t \rangle \leq 0\}}_{(\diamond)} + \frac{2}{n} \mathbb{E}_\epsilon \left\| \sum_{t=1}^n \epsilon_t x_t \right\|_2. \quad (34)$$

The second term is controlled by Theorem 7, which gives  $\frac{1}{n} \mathbb{E}_\epsilon \left\| \sum_{t=1}^n \epsilon_t x_t \right\|_2 \leq \frac{1}{\sqrt{n}}$ . For the first term, we appeal to the fat-shattering dimension and the  $\phi_2$ -soft-margin assumption.

**Controlling  $(\diamond)$ .** Observe that for any fixed  $\tilde{\gamma} > 0$ , we can split  $(\diamond)$  as

$$\begin{aligned} \mathbb{E}_\epsilon \sup_{w \in \mathcal{W}(\phi_2, \widehat{\mathcal{D}}_n)} \frac{1}{n} \sum_{t=1}^n \epsilon_t \mathbb{1}\{y_t \langle w, x_t \rangle \leq 0\} &\leq \underbrace{\mathbb{E}_\epsilon \sup_{w \in \mathcal{W}(\phi_2, \widehat{\mathcal{D}}_n)} \frac{1}{n} \sum_{t=1}^n \epsilon_t \mathbb{1}\{y_t \langle w, x_t \rangle \leq 0 \wedge \frac{|\langle w, x_t \rangle|}{\|w\|_2 \|x_t\|_2} \geq \tilde{\gamma}\}}_{(*)} \\ &\quad + \underbrace{\mathbb{E}_\epsilon \sup_{w \in \mathcal{W}(\phi_2, \widehat{\mathcal{D}}_n)} \frac{1}{n} \sum_{t=1}^n \epsilon_t \mathbb{1}\{y_t \langle w, x_t \rangle \leq 0 \wedge \frac{|\langle w, x_t \rangle|}{\|w\|_2 \|x_t\|_2} < \tilde{\gamma}\}}_{(**)}. \end{aligned}$$



For  $(\star\star)$ , the definition of  $\mathcal{W}(\phi_2, \widehat{\mathcal{D}}_n)$  implies

$$\mathbb{E}_\epsilon \sup_{w \in \mathcal{W}(\phi_2, \widehat{\mathcal{D}}_n)} \frac{1}{n} \sum_{t=1}^n \epsilon_t \mathbb{1} \left\{ y_t \langle w, x_t \rangle \leq 0 \wedge \frac{|\langle w, x_t \rangle|}{\|w\|_2 \|x_t\|_2} < \tilde{\gamma} \right\} \leq \sup_{w \in \mathcal{W}(\phi_2, \widehat{\mathcal{D}}_n)} \frac{1}{n} \sum_{t=1}^n \mathbb{1} \left\{ \frac{|\langle w, x_t \rangle|}{\|w\|_2 \|x_t\|_2} < \tilde{\gamma} \right\} \leq \phi_2(\tilde{\gamma}). \quad (35)$$

The quantity  $(\star)$  can be bounded by writing it as

$$\mathbb{E}_\epsilon \sup_{v \in V} \frac{1}{n} \sum_{t=1}^n \epsilon_t v_t,$$

where  $V$  is a boolean concept class defined as  $V = \{(v_1(w), \dots, v_n(w)) \in \{0, 1\}^n \mid w \in \mathcal{W}(\phi_2, \widehat{\mathcal{D}}_n)\}$ , where  $v_i(w) := \mathbb{1} \left\{ y_i \frac{\langle w, x_i \rangle}{\|w\|_2 \|x_i\|_2} \leq 0 \right\}$ .  $\mathbb{1} \left\{ \frac{|\langle w, x_i \rangle|}{\|w\|_2 \|x_i\|_2} \geq \tilde{\gamma} \right\}$ . The standard Massart finite class lemma (e.g. [32]) implies

$$\mathbb{E}_\epsilon \sup_{v \in V} \frac{1}{n} \sum_{t=1}^n \epsilon_t v_t \leq \sqrt{\frac{2 \log |V|}{n}}.$$

All that remains is to bound the cardinality of  $V$ . To this end, note that we can bound  $|V|$  by first counting the number of realizations of  $\left( \mathbb{1} \left\{ \frac{|\langle w, x_1 \rangle|}{\|w\|_2 \|x_1\|_2} \geq \tilde{\gamma} \right\}, \dots, \mathbb{1} \left\{ \frac{|\langle w, x_n \rangle|}{\|w\|_2 \|x_n\|_2} \geq \tilde{\gamma} \right\} \right)$  as we vary  $w \in \mathcal{W}(\phi_2, \widehat{\mathcal{D}}_n)$ . This is at most  $\binom{n}{n\phi_2(\tilde{\gamma})} \leq n^{n\phi_2(\tilde{\gamma})}$ , since the number of points with margin smaller than  $\tilde{\gamma}$  is bounded by  $n\phi_2(\tilde{\gamma})$  via (32).

Next, we consider only the points  $x_t$  for which  $\mathbb{1} \left\{ \frac{|\langle w, x_t \rangle|}{\|w\|_2 \|x_t\|_2} \geq \tilde{\gamma} \right\} = 1$ . On these points, on which we are guaranteed to have a margin at least  $\tilde{\gamma}$ , we count the number of realizations of  $\mathbb{1} \left\{ y_t \frac{\langle w, x_t \rangle}{\|w\|_2 \|x_t\|_2} \leq 0 \right\}$ .

This is bounded by  $n^{O(\frac{1}{\tilde{\gamma}^2})}$  due to the Sauer-Shelah lemma (e.g. [39]). The fat-shattering dimension at margin  $\tilde{\gamma}$  coincides with the notion of shattering on these points, and [4] bound the fat-shattering dimension at scale  $\tilde{\gamma}$  by  $O(\frac{1}{\tilde{\gamma}^2})$ . Hence, the cardinality of  $V$  is bounded by

$$|V| \leq n^{n\phi_2(\tilde{\gamma})} n^{O(\frac{1}{\tilde{\gamma}^2})}. \quad (36)$$

**Final bound.** Assembling equations (33), (34), (35), and (36) yields

$$\begin{aligned} \sup_{w \in \mathcal{W}(\phi, \widehat{\mathcal{D}}_n)} \|\nabla L_{\mathcal{D}}(w) - \nabla \widehat{L}_n(w)\|_2 &\leq O \left( \phi_2(\tilde{\gamma}) + \sqrt{\frac{\log |V|}{n}} + \sqrt{\frac{\log(1/\delta)}{n}} \right) \\ &\leq O \left( \phi_2(\tilde{\gamma}) + \sqrt{\left( \phi_2(\tilde{\gamma}) + \frac{1}{\tilde{\gamma}^2 n} \right) \log(n)} + \sqrt{\frac{\log(1/\delta)}{n}} \right) \\ &\leq \tilde{O} \left( \sqrt{\phi_2(\tilde{\gamma})} + \frac{1}{\tilde{\gamma} \sqrt{n}} + \sqrt{\frac{\log(1/\delta)}{n}} \right) \\ &\leq \tilde{O} \left( \sqrt{\phi(4\tilde{\gamma})} + \frac{1}{\tilde{\gamma}} \sqrt{\frac{\log(1/\delta)}{n}} + \frac{1}{\sqrt{\tilde{\gamma}} n^{1/4}} \right). \end{aligned}$$

The chain of inequalities above follows by observing that  $\phi_2(\tilde{\gamma}) = \phi(4\tilde{\gamma}) + 2\psi(2\tilde{\gamma})$  is bounded and thus  $\phi_2(\gamma) \leq c\sqrt{\phi_2(\gamma)}$  for some constant  $c$  independent of  $\tilde{\gamma}$ . We get the desired result by optimizing over  $\tilde{\gamma}$ .  $\square$

## E Additional Results

**Theorem 10** (Second-order chain rule for Rademacher complexity). *Let two sequences of twice-differentiable functions  $G_t : \mathbb{R}^K \rightarrow \mathbb{R}$  and  $F_t : \mathbb{R}^d \rightarrow \mathbb{R}^K$  be given, and let  $F_{t,i}(w)$  denote the  $i$ th of*

coordinate of  $F_t(w)$ . Suppose there are constants  $L_{F,1}$ ,  $L_{F,2}$ ,  $L_{G,1}$ ,  $L_{G,2}$  such that for all  $1 \leq t \leq n$ ,  $\|\nabla G_t\|_2 \leq L_{G,1}$ ,  $\sqrt{\sum_{i,j} \|(\nabla F_{t,i})(\nabla F_{t,j})^\top\|_\sigma^2} \leq L_{F,1}$ ,  $\|\nabla^2 G_t\|_2 \leq L_{G,2}$  and  $\sqrt{\sum_{k=1}^K \|\nabla^2 F_{t,k}\|_\sigma^2} \leq L_{F,2}$ . Then,

$$\begin{aligned} \frac{1}{2} \mathbb{E}_\epsilon \sup_{w \in \mathcal{W}} \left\| \sum_{t=1}^n \epsilon_t \nabla^2 (G_t(F_t(w))) \right\|_\sigma &\leq L_{F,1} \mathbb{E}_\epsilon \sup_{w \in \mathcal{W}} \sum_{t=1}^n \langle \epsilon_t, \nabla G_t(F_t(w)) \rangle \\ &\quad + L_{G,1} \mathbb{E}_\epsilon \sup_{w \in \mathcal{W}} \left\| \sum_{t=1}^n \sum_{i=1}^K \epsilon_{t,i} \nabla^2 F_{t,i}(w) \right\|_\sigma \\ &\quad + L_{F,2} \mathbb{E}_{\tilde{\epsilon}} \sup_{w \in \mathcal{W}} \sum_{t=1}^n \langle \tilde{\epsilon}_t, \nabla^2 G_t(F_t(w)) \rangle \\ &\quad + L_{G,2} \mathbb{E}_{\tilde{\epsilon}} \sup_{w \in \mathcal{W}} \left\| \sum_{t=1}^n \sum_{i,j=1}^K \tilde{\epsilon}_{t,i,j} \nabla F_{t,i}(w) \nabla F_{t,j}(w)^\top \right\|_\sigma, \end{aligned}$$

where for all  $i \in [K]$ ,  $\nabla F_{t,i}(w)$  denotes the  $i^{\text{th}}$  column of the Jacobian matrix  $\nabla F_t \in \mathbb{R}^{d \times K}$ ,  $\nabla^2 F_{t,i} \in \mathbb{R}^{d \times d}$  denotes the  $i$ th slice of the Hessian operator  $\nabla^2 F_t \in \mathbb{R}^{d \times d \times K}$ , and  $\epsilon \in \{\pm 1\}^{n,K}$  and  $\tilde{\epsilon} \in \{\pm 1\}^{n \times K \times K}$  are matrices of Rademacher random variables.

As an application of [Theorem 10](#), we give a simple proof of dimension-independent Rademacher bound for the generalized linear model setting.

**Lemma 12.** Assume in addition to [Assumption 1](#) assume that  $|\sigma'''(s)| \leq C_\sigma$  for all  $s \in \mathcal{S}$ , and suppose  $\|\cdot\|$  is any  $\beta$ -smooth norm. Then the empirical loss Hessian for the generalized linear model setting enjoys the normed Rademacher complexity bound,

$$\mathbb{E}_\epsilon \sup_{w \in \mathcal{W}} \left\| \sum_{t=1}^n \epsilon_t \nabla^2 \ell(w; x_t, y_t) \right\|_\sigma \leq O\left((BR^3 C_\sigma^2 \sqrt{\beta} + C_\sigma^2 R^2 \sqrt{\log(d)}) \sqrt{n}\right). \quad (37)$$

It is easy to see that the same approach leads to a normed Rademacher complexity bound for the Hessian in the robust regression setting as well. We leave the proof as an exercise.

**Lemma 13.** Assume in addition to [Assumption 2](#) that  $|\rho'''(s)| \leq C_\rho$  for all  $s \in \mathcal{S}$ , and suppose  $\|\cdot\|$  is any  $\beta$ -smooth norm. Then the empirical loss Hessian for the robust regression setting enjoys the normed Rademacher complexity bound:

$$\mathbb{E}_\epsilon \sup_{w \in \mathcal{W}} \left\| \sum_{t=1}^n \epsilon_t \nabla^2 \ell(w; x_t, y_t) \right\|_\sigma \leq O\left((BR^3 C_\rho \sqrt{\beta} + C_\rho R^2 \sqrt{\log(d)}) \sqrt{n}\right). \quad (38)$$

**Proof of Theorem 10.** We start by writing

$$\mathbb{E}_\epsilon \sup_{w \in \mathcal{W}} \left\| \sum_{t=1}^n \epsilon_t \nabla^2 (G_t(F_t(w))) \right\|_\sigma = \mathbb{E}_\epsilon \sup_{w \in \mathcal{W}} \sup_{\substack{u \in \mathbb{R}^d \\ \|u\|_2 \leq 1}} \sum_{t=1}^n \epsilon_t u^\top \nabla^2 (G_t(F_t(w))) u. \quad (39)$$

Using the chain rule for differentiation, we have for any  $u \in \mathbb{R}^n$

$$u^\top \nabla^2 (G_t(F_t(w))) u = \langle \nabla F_t(w), u \rangle^\top \nabla^2 G_t(F_t(w)) \langle \nabla F_t(w), u \rangle + \langle \nabla G_t(F_t(w)), \nabla^2 F_t(w)[u, u] \rangle,$$

where  $\nabla G_t(F_t(w))$  and  $\nabla^2 G_t(F_t(w))$  denote the gradient and Hessian of  $G_t$  at  $F_t(w)$ , and  $\nabla^2 F_t(w)[u, u] \in \mathbb{R}^K$  is a vector for which the  $i$ th coordinate is the evaluation of the Hessian operator for  $F_{t,i}$  at  $(u, u)$ . Using this identity along with (39), we get

$$\begin{aligned} \mathbb{E}_\epsilon \sup_{w \in \mathcal{W}} \left\| \sum_{t=1}^n \epsilon_t \nabla^2 (G_t(F_t(w))) \right\|_\sigma &\leq \mathbb{E}_\epsilon \sup_{w \in \mathcal{W}} \sup_{\substack{u \in \mathbb{R}^d \\ \|u\|_2 \leq 1}} \sum_{t=1}^n \epsilon_t \langle \nabla G_t(F_t(w)), \nabla^2 F_t(w)[u, u] \rangle \\ &\quad + \mathbb{E}_\epsilon \sup_{w \in \mathcal{W}} \sup_{\substack{u \in \mathbb{R}^d \\ \|u\|_2 \leq 1}} \sum_{t=1}^n \epsilon_t \langle \nabla F_t(w), u \rangle^\top \nabla^2 G_t(F_t(w)) \langle \nabla F_t(w), u \rangle. \end{aligned}$$

We bound the two terms separately.

1. *First Term:* We introduce a new function that relabels the quantities in the expression. Let  $h_1 : \mathbb{R}^{2K} \rightarrow \mathbb{R}$  be defined as  $h_1(a, b) = \langle a, b \rangle$ , let  $f_1 : \mathcal{W} \times \mathbb{R}^d \rightarrow \mathbb{R}^K$  be given by  $f_1(w, u) = \nabla G_t(F_t(w))$  and  $f_2 : \mathcal{W} \times \mathbb{R}^d \rightarrow \mathbb{R}^K$  be given by  $f_2(w, u) = (\nabla^2 F_{t,k}(w)[u, u])_{k \in [K]}$ . We apply the block-wise contraction lemma [Lemma 3](#) with one block for  $f_1$  and one block for  $f_2$  to conclude

$$\begin{aligned}
& \frac{1}{2} \mathbb{E}_\epsilon \sup_{w \in \mathcal{W}} \sup_{\substack{u \in \mathbb{R}^d \\ \|u\|_2 \leq 1}} \sum_{t=1}^n \epsilon_t h_1(f_1(w, u), f_2(w, u)) \\
& \leq L_{F,1} \mathbb{E}_\epsilon \sup_{w \in \mathcal{W}} \sup_{\substack{u \in \mathbb{R}^d \\ \|u\|_2 \leq 1}} \sum_{t=1}^n \langle \epsilon_t, f_1(w, u) \rangle + L_{G,1} \mathbb{E}_\epsilon \sup_{w \in \mathcal{W}} \sup_{\substack{u \in \mathbb{R}^d \\ \|u\|_2 \leq 1}} \sum_{t=1}^n \langle \epsilon_t, f_2(w, u) \rangle \\
& \leq L_{F,1} \mathbb{E}_\epsilon \sup_{w \in \mathcal{W}} \sup_{\substack{u \in \mathbb{R}^d \\ \|u\|_2 \leq 1}} \sum_{t=1}^n \langle \epsilon_t, \nabla G_t(F_t(w)) \rangle + L_{G,1} \mathbb{E}_\epsilon \sup_{w \in \mathcal{W}} \sup_{\substack{u \in \mathbb{R}^d \\ \|u\|_2 \leq 1}} \sum_{t=1}^n \langle \epsilon_t, \nabla^2 F_t(w)[u, u] \rangle \\
& \leq L_{F,1} \mathbb{E}_\epsilon \sup_{w \in \mathcal{W}} \sum_{t=1}^n \langle \epsilon_t, \nabla G_t(F_t(w)) \rangle + L_{G,1} \mathbb{E}_\epsilon \sup_{w \in \mathcal{W}} \sup_{\substack{u \in \mathbb{R}^d \\ \|u\|_2 \leq 1}} \left( \sum_{t=1}^n \nabla^2 F_t(w) \epsilon_t \right) [u, u] \\
& = L_{F,1} \mathbb{E}_\epsilon \sup_{w \in \mathcal{W}} \sum_{t=1}^n \langle \epsilon_t, \nabla G_t(F_t(w)) \rangle + L_{G,1} \mathbb{E}_\epsilon \sup_{w \in \mathcal{W}} \left\| \sum_{t=1}^n \nabla^2 F_t(w) \epsilon_t \right\|_\sigma.
\end{aligned}$$

2. *Second Term:* Let us first simplify as

$$\begin{aligned}
\langle \nabla F_t(w), u \rangle^\top \nabla^2 G_t(F_t(w)) \langle \nabla F_t(w), u \rangle &= \sum_{i,j=1}^K \langle \nabla F_t(w), u \rangle_i \nabla^2 G_t(F_t(w))_{i,j} \langle \nabla F_t(w), u \rangle_j \\
&= \sum_{i,j=1}^K (u^\top \nabla F_{t,i}(w)) \times \frac{\partial^2 G_t}{\partial z_i \partial z_j} \times (\nabla F_{t,j}(w)^\top u) \\
&= \sum_{i,j=1}^K \frac{\partial^2 G_t}{\partial z_i \partial z_j} (u^\top \nabla F_{t,i}(w) \nabla F_{t,j}(w)^\top u),
\end{aligned}$$

where  $\nabla F_{t,j}(w) := \nabla F_t(w)[\cdot, j] \in \mathbb{R}^d$ , and the last equality follows by observing that  $\frac{\partial^2 G_t}{\partial z_i \partial z_j}$  is scalar. We thus have

$$\begin{aligned}
& \mathbb{E}_\epsilon \sup_{w \in \mathcal{W}} \sup_{\substack{u \in \mathbb{R}^d \\ \|u\|_2 \leq 1}} \sum_{t=1}^n \epsilon_t \langle \nabla F_t(w), u \rangle^\top \nabla^2 G_t(F_t(w)) \langle \nabla F_t(w), u \rangle \\
& = \mathbb{E}_\epsilon \sup_{w \in \mathcal{W}} \sup_{\substack{u \in \mathbb{R}^d \\ \|u\|_2 \leq 1}} \sum_{t=1}^n \epsilon_t \sum_{i,j=1}^K \frac{\partial^2 G_t}{\partial z_i \partial z_j} (u^\top \nabla F_{t,i}(w) \nabla F_{t,j}(w)^\top u).
\end{aligned}$$

Similar to the first part, we introduce a new function that relabels the quantities in the expression. Let  $h_2 : \mathbb{R}^{2K^2} \rightarrow \mathbb{R}$  be defined as  $h_2(a, b) = \sum_{i,j=1}^K a_{i,j} b_{i,j}$ . Let  $f_1 : \mathcal{W} \times \mathbb{R}^d \rightarrow \mathbb{R}^{K^2}$  be given by  $f_1(w, u) = (\nabla^2 G_t)(F_t(w))$  and  $f_2 : \mathcal{W} \times \mathbb{R}^d \rightarrow \mathbb{R}^{K^2}$  be given by  $f_2(w, u) = (u^\top \nabla F_{t,i}(w) \nabla F_{t,j}(w)^\top u)_{i,j \in [K]}$ . We apply block-wise contraction ([Lemma 3](#))

with one block for  $f_1$  and one block for  $f_2$  to conclude

$$\begin{aligned}
& \frac{1}{2} \mathbb{E}_\epsilon \sup_{w \in \mathcal{W}} \sup_{\substack{u \in \mathbb{R}^d \\ \|u\|_2 \leq 1}} \sum_{t=1}^n \epsilon_t h_2(f_1(w, u), f_2(w, u)) \\
& \leq L_{F,2} \mathbb{E}_\epsilon \sup_{w \in \mathcal{W}} \sup_{\substack{u \in \mathbb{R}^d \\ \|u\|_2 \leq 1}} \sum_{t=1}^n \langle \epsilon_t, f_1(w, u) \rangle + L_{G,2} \mathbb{E}_\epsilon \sup_{w \in \mathcal{W}} \sup_{\substack{u \in \mathbb{R}^d \\ \|u\|_2 \leq 1}} \sum_{t=1}^n \langle \epsilon_t, f_2(w, u) \rangle \\
& \leq L_{F,2} \mathbb{E}_\epsilon \sup_{w \in \mathcal{W}} \sum_{t=1}^n \langle \epsilon_t, \nabla^2 G_t(F_t(w)) \rangle + L_{G,2} \mathbb{E}_\epsilon \sup_{w \in \mathcal{W}} \sup_{\substack{u \in \mathbb{R}^d \\ \|u\|_2 \leq 1}} \sum_{t=1}^n \sum_{i,j=1}^K \epsilon_{t,i,j} u^\top \nabla F_{t,i}(w) \nabla F_{t,j}(w)^\top u \\
& = L_{F,2} \mathbb{E}_\epsilon \sup_{w \in \mathcal{W}} \sum_{t=1}^n \langle \epsilon_t, \nabla^2 G_t(F_t(w)) \rangle + L_{G,2} \mathbb{E}_\epsilon \sup_{w \in \mathcal{W}} \left\| \sum_{t=1}^n \sum_{i,j=1}^K \epsilon_{t,i,j} \nabla F_{t,i}(w) \nabla F_{t,j}(w)^\top \right\|_\sigma.
\end{aligned}$$

Combining the two terms gives the desired chain rule.  $\square$

**Proof of Lemma 12.** As in Lemma 7, let  $G_t(s) = (\sigma(s) - y_t)^2$  and  $F_t(w) = \langle w, x_t \rangle$ , so that  $\ell(w; x_t, y_t) = G_t(F_t(w))$ .

Observe that  $G'_t(s) = 2(\sigma(s) - y_t)\sigma'(s)$ ,  $\nabla F_t(w) = x_t$ ,  $\nabla^2 F_t = \mathbf{0}$ ,  $G''_t(s)(s) = 2(\sigma'(s))^2 + 2y_t\sigma''(s)$ , and  $G'''_t(s) = 4\sigma'(s)\sigma''(s) + 2y_t\sigma'''(s)$ , which implies that  $|G'''_t(s)| \leq 6C_\sigma^2$ . Using Theorem 10 with constants  $L_{F,1} = R^2$ ,  $L_{F,2} = 0$ ,  $L_{G,1} = 2C_\sigma^2$  and  $L_{G,2} = 4C_\sigma^2$ , we get

$$\mathbb{E}_\epsilon \sup_{w \in \mathcal{W}} \left\| \sum_{t=1}^n \epsilon_t \nabla^2 \ell(w; x_t, y_t) \right\|_\sigma \leq 2R^2 \mathbb{E}_\epsilon \sup_{w \in \mathcal{W}} \sum_{t=1}^n \epsilon_t G''_t(\langle w, x_t \rangle) + 8C_\sigma^2 \mathbb{E}_\epsilon \sup_{w \in \mathcal{W}} \left\| \sum_{t=1}^n \epsilon_t x_t x_t^\top \right\|_\sigma,$$

applying Lemma 3,

$$\begin{aligned}
& \leq 12R^2 C_\sigma^2 \mathbb{E}_\epsilon \sup_{w \in \mathcal{W}} \sum_{t=1}^n \epsilon_t \langle w, x_t \rangle + 8C_\sigma^2 \mathbb{E}_\epsilon \sup_{w \in \mathcal{W}} \left\| \sum_{t=1}^n \epsilon_t x_t x_t^\top \right\|_\sigma \\
& = 12R^2 C_\sigma^2 B \mathbb{E}_\epsilon \left\| \sum_{t=1}^n \epsilon_t x_t \right\| + 8C_\sigma^2 \mathbb{E}_\epsilon \left\| \sum_{t=1}^n \epsilon_t x_t x_t^\top \right\|_\sigma.
\end{aligned}$$

Invoking Theorem 7 and Fact 1, we have  $\mathbb{E}_\epsilon \left\| \sum_{t=1}^n \epsilon_t x_t \right\| \leq \sqrt{2\beta R^2 n}$  and  $\mathbb{E}_\epsilon \left\| \sum_{t=1}^n \epsilon_t x_t x_t^\top \right\|_\sigma \leq \sqrt{2\log(d) R^4 n}$ .  $\square$
